# Supplementary material for: A Psychometric Evaluation of the Short Grit Scale
Source: Atypon-hosted journal article supplement (doi:10.1027/1015-5759/a000535), 2019-07-03
Supplement: 1015-5759_a000535_esm1.pdf [file 1015-5759_a000535_esm1.pdf]

**Electronic Supplementary Material for *A Psychometric Evaluation of the Short Grit Scale: A Closer Look at its Factor Structure and Scale Functioning***

## Items as Proprietary

Full items can be obtained in Duckworth and Quinn (2009). The items are listed as proprietary. Below we provide labels, subscales, and a keyword so that researchers can match the items listed in this article to the items listed in Duckworth and Quinn (2009) for the Grit-S.

Table A1. *Grit-S items and corresponding labels*

| Label | Subscale | Item keyword(s) |
|-------|----------|-----------------|
| GS1   | CI       | new ideas       |
| GS2   | PE       | setbacks        |
| GS3   | CI       | lost interest   |
| GS4   | PE       | hard worker     |
| GS5   | CI       | goal            |
| GS6   | CI       | focus           |
| GS7   | PE       | finish          |
| GS8   | PE       | diligent        |

Note: CI=consistency in interest; PE=perseverance of effort

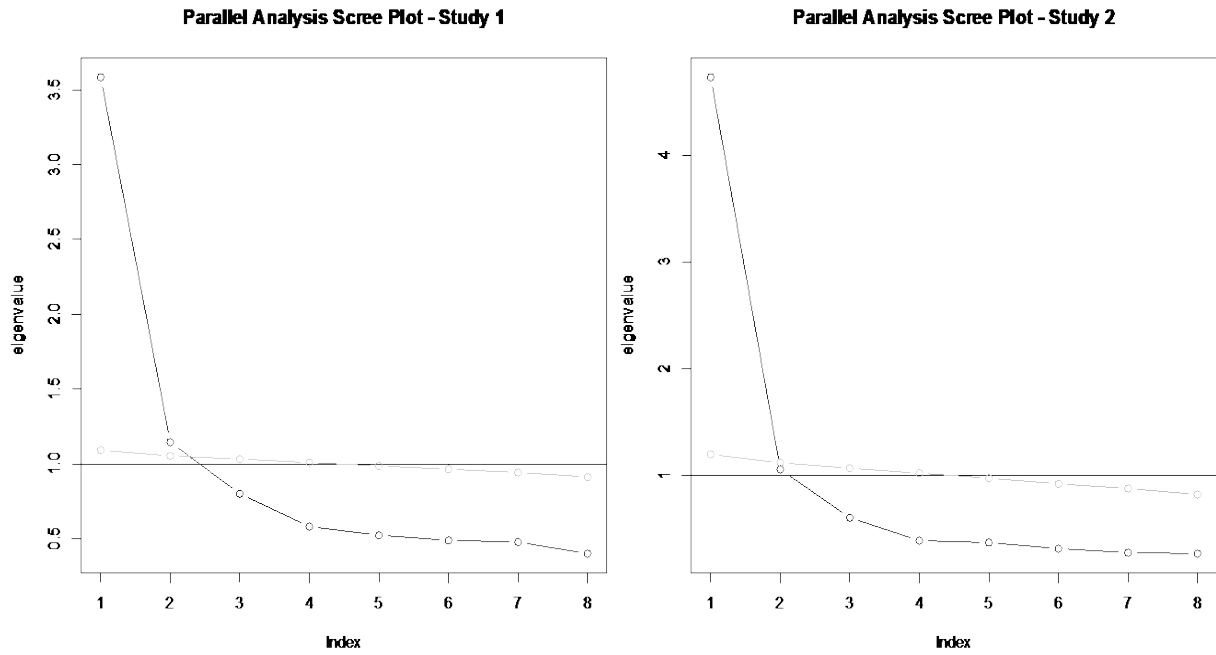

**Figure A.** Parallel Analysis Scree Plots for the Grit-S in Study 1 (left) and Study 2 (right). Note: vertical axes differ; gray lines= simulated eigenvalues; black lines=data eigenvalues

Table B. Means, Standard Deviations, and Correlations Among the Grit-S Items

| Items   | GS1   | GS3   | GS5   | GS6   | GS2   | GS4   | GS7   | GS8   |
|---------|-------|-------|-------|-------|-------|-------|-------|-------|
| GS1     | -     | 0.703 | 0.664 | 0.626 | 0.432 | 0.346 | 0.579 | 0.425 |
| GS3     | 0.464 | -     | 0.710 | 0.658 | 0.396 | 0.335 | 0.569 | 0.415 |
| GS5     | 0.442 | 0.535 | -     | 0.681 | 0.432 | 0.493 | 0.620 | 0.480 |
| GS6     | 0.477 | 0.496 | 0.576 | -     | 0.480 | 0.437 | 0.635 | 0.498 |
| GS2     | 0.121 | 0.175 | 0.183 | 0.253 | -     | 0.434 | 0.503 | 0.472 |
| GS4     | 0.216 | 0.248 | 0.281 | 0.346 | 0.264 | -     | 0.541 | 0.668 |
| GS7     | 0.405 | 0.448 | 0.433 | 0.492 | 0.281 | 0.413 | -     | 0.669 |
| GS8     | 0.245 | 0.299 | 0.312 | 0.384 | 0.267 | 0.513 | 0.454 | -     |
| Mean S1 | 2.482 | 2.848 | 3.084 | 3.001 | 3.201 | 4.333 | 3.578 | 3.955 |
| SD S1   | 1.128 | 1.272 | 1.183 | 1.292 | 1.176 | 0.901 | 1.062 | 0.955 |
| Mean S2 | 3.102 | 3.088 | 3.059 | 4.291 | 3.331 | 3.473 | 3.741 | 4.069 |
| SD S2   | 1.118 | 1.216 | 1.178 | 0.822 | 1.066 | 1.256 | 1.051 | 0.862 |

Note: correlations below the diagonal are correlations for items in Study 1 and correlations above the diagonal are correlations for items in Study 2. S1 = study 1; S2 = study 2; SD = standard deviation. Item labels are described in Table A.

Table C. *Unstandardized Factor Loadings and Intercepts for Partial Invariance Models across Gender, Education, and Race in Study 1.*

| Factor $\lambda$ | Gender             |       | Education |       |                    |          | Race  |       |       |                    |       |       |
|------------------|--------------------|-------|-----------|-------|--------------------|----------|-------|-------|-------|--------------------|-------|-------|
|                  | Females            | Males | <H.S      | H.S.  | College            | >College | Asian | Black | White | Other              |       |       |
| GS1              |                    | .693  |           |       | .701               |          |       |       | .690  |                    |       |       |
| GS3              |                    | .876  |           |       | .862               |          |       |       | .862  |                    |       |       |
| GS5              |                    | .859  |           |       | .838               |          |       |       | .846  |                    |       |       |
| GS6              |                    | 1.003 |           |       | .977               |          |       |       | .985  |                    |       |       |
| GS2              |                    | .381  |           |       | .368               |          |       |       | .376  |                    |       |       |
| GS4              |                    | .405  | .480      | .430  |                    | .311     | .241  |       | .401  |                    |       |       |
| GS7              |                    | .722  |           |       | .696               |          |       |       | .709  |                    |       |       |
| GS8              |                    | .486  |           |       | .444               |          |       |       | .481  |                    |       |       |
| GS4~GS8          | .208               |       | .305      | .242  | .244               | .272     | .175  | .373  | .043  | .254               | .236  |       |
| $\kappa$         | .000 <sup>a</sup>  |       | .074      | -.097 | 0.000 <sup>a</sup> | .358     | .665  | .091  | .330  | .000 <sup>a</sup>  | .041  |       |
| $\phi$           | 1.000 <sup>a</sup> |       | .931      | .856  | 1.000 <sup>a</sup> | 1.040    | .838  | .977  | .925  | 1.000 <sup>a</sup> | 1.065 |       |
| Intercepts       |                    |       |           |       |                    |          |       |       |       |                    |       |       |
| GS1              |                    | 2.464 |           | 2.342 | 2.497              |          | 2.298 | 2.139 |       | 2.452              |       |       |
| GS3              |                    | 2.827 |           |       |                    | 2.725    |       |       |       | 2.812              |       |       |
| GS5              |                    | 3.062 |           |       |                    | 2.959    |       |       |       | 3.055              |       |       |
| GS6              |                    | 2.977 |           |       |                    | 2.865    |       |       |       | 2.960              |       |       |
| GS2              |                    | 3.188 |           |       |                    | 3.152    |       |       |       | 3.182              |       |       |
| GS4              | 4.393              |       | 4.173     | 4.210 | 4.285              |          | 4.322 | 4.459 | 4.187 | 4.380              | 4.344 | 4.233 |
| GS7              |                    | 3.561 |           |       |                    | 3.480    |       |       |       | 3.548              |       |       |
| GS8              | 4.003              |       | 3.821     | 3.791 | 3.846              |          | 3.982 | 4.055 |       | 3.939              |       |       |

Note:  $\lambda$  = factor loading; ~ = correlated uniqueness;  $\kappa$  = latent variable mean;  $\phi$  = latent variable variance; <sup>a</sup> = fixed for identification; <H.S. = less than high school education; H.S. high school education;

### **Description of the outcomes**

The following are the descriptions of the self regulation measures from Eisenberg et al., (2018):

The Self-Regulation Questionnaire (SSRQ) is a 31-item self-report measure of the ability to regulate behavior to achieve one's goals. Participants indicate the extent to which they agree with each item using a 5-point Likert scale: 1 (Strongly Disagree), 2 (Somewhat Disagree), 3 (Neutral), 4 (Somewhat Agree), and 5 (Strongly Agree). The measure has one total scale computed by summing the items (after reverse-coding certain items, as needed). Examples of items include the following: "Once I have a goal, I can usually plan how to reach it," "I have a lot of willpower, " and "As soon as I see a problem or challenge, I start looking for possible solutions.

The Emotion Regulation Questionnaire (ERQ) is a 10-item self-report scale designed to assess habitual use of two commonly used strategies to alter emotion: cognitive reappraisal and expressive suppression. Participants respond to each item using a 7-point Likert scale ranging from 1 (strongly disagree) to 7 (strongly agree). Cognitive reappraisal involves thinking differently about a situation in order to change its meaning in order to alter one's emotional experience. Expressive suppression involves decreasing the outward expression of emotion. Six items contribute to the subscale for cognitive reappraisal (e.g., "When I'm faced with a stressful situation, I make myself think about it in a way that helps me stay calm"). Four items contribute to the subscale for expressive suppression (e.g., "When I am feeling negative emotions, I make sure not to express them")

The Mindful Attention Awareness Scale (MAAS) is a 15-item self-report survey that measures the tendency to be fully aware of one's experience in the present moment without distraction or forgetfulness. Participants indicate whether they frequently or infrequently experience each item using a 6-point Likert scale: 1 (Almost Always), 2 (Very Frequently), 3 (Somewhat Frequently), 4 (Somewhat Infrequently), 5 (Very Infrequently), and 6 (Almost Never). The scale was developed with the understanding that people likely have better conscious access to information about their tendency to be mindless rather than mindful. As a result, the total score for the MAAS is computed by reverse-scoring and then summing all items. Examples of items include the following: "I find it difficult to stay focused on what's happening in the present, " "I do jobs or tasks automatically, without being aware of what I'm doing, " and "I snack without being aware that I'm eating."

## PSYCHOMETRIC EVALUATION OF THE GRIT-S

### Item Fit

Below, we report the  $S-X^2$  statistics to evaluate the fit of the IRT model to the dataset (Kang & Chen, 2008; Orlando & Thissen, 2000). These are chi-square tests, so the p-values should be above .05. Statistics suggest that the model fit the data well in Sample 1. In Sample 2, there were some problematic items, particularly item 4 and 8 which had correlated uniquenesses in the determined model and were also flagged for measurement bias.

#### Sample 1:

| item | S_X2       | df.S_X2 | p.S_X2 |
|------|------------|---------|--------|
| 1    | GS1 78.818 | 66      | 0.134  |
| 2    | GS2 65.584 | 67      | 0.526  |
| 3    | GS3 72.618 | 64      | 0.215  |
| 4    | GS4 73.426 | 60      | 0.114  |
| 5    | GS5 91.634 | 83      | 0.242  |
| 6    | GS6 67.993 | 64      | 0.343  |
| 7    | GS7 74.499 | 64      | 0.174  |
| 8    | GS8 68.897 | 63      | 0.285  |

#### Sample 2:

| item | S_X2       | df.S_X2 | p.S_X2 |
|------|------------|---------|--------|
| 1    | GS1 50.895 | 41      | 0.138  |
| 2    | GS2 68.236 | 57      | 0.146  |
| 3    | GS3 57.617 | 41      | 0.044  |
| 4    | GS4 57.539 | 38      | 0.022  |
| 5    | GS5 37.945 | 34      | 0.294  |
| 6    | GS6 31.634 | 39      | 0.793  |
| 7    | GS7 42.731 | 32      | 0.097  |
| 8    | GS8 73.696 | 38      | 0.000  |

### **Local Dependence Analysis.**

Typically, when two items exhibit local dependence and one item from the pair is deleted, the factor loading of the other item typically decreases while the factor loadings for the rest of the items in the factor typically increase (Edwards et al., 2017). In this case we used the Jackknife Slope Index (JSI) to flag items that exhibit local dependence (Edwards et al., 2017). The goal of the JSI is to investigate how much factor loadings change when one of the items is removed from the scale, similar to a DFBETAS measure of influence from regression (Cohen, Cohen, West, & Aiken, 2003). High JSI values, defined as those greater than two standard deviations away from the mean of the JSI estimated values, indicate that factor loading estimates change substantially when one of the items is dropped.

**Study 1.** Our analysis did not flag any items for violations of local dependence with the suggested cutoff value. However, it is recommended to proceed with caution because the JSI value for the item pair GS4 and GS8 was -4.216, which is close to the JSI confidence limits of -4.714 and 4.797.

**Study 2.** The JSI did not flag any items for violations of local dependence with the suggested cutoff value but should be interpreted with caution. Specifically, the JSI value for the item pair GS4 and GS8 in Study 2 was -2.221 and the JSI confidence limits were -2.998 and 3.046.



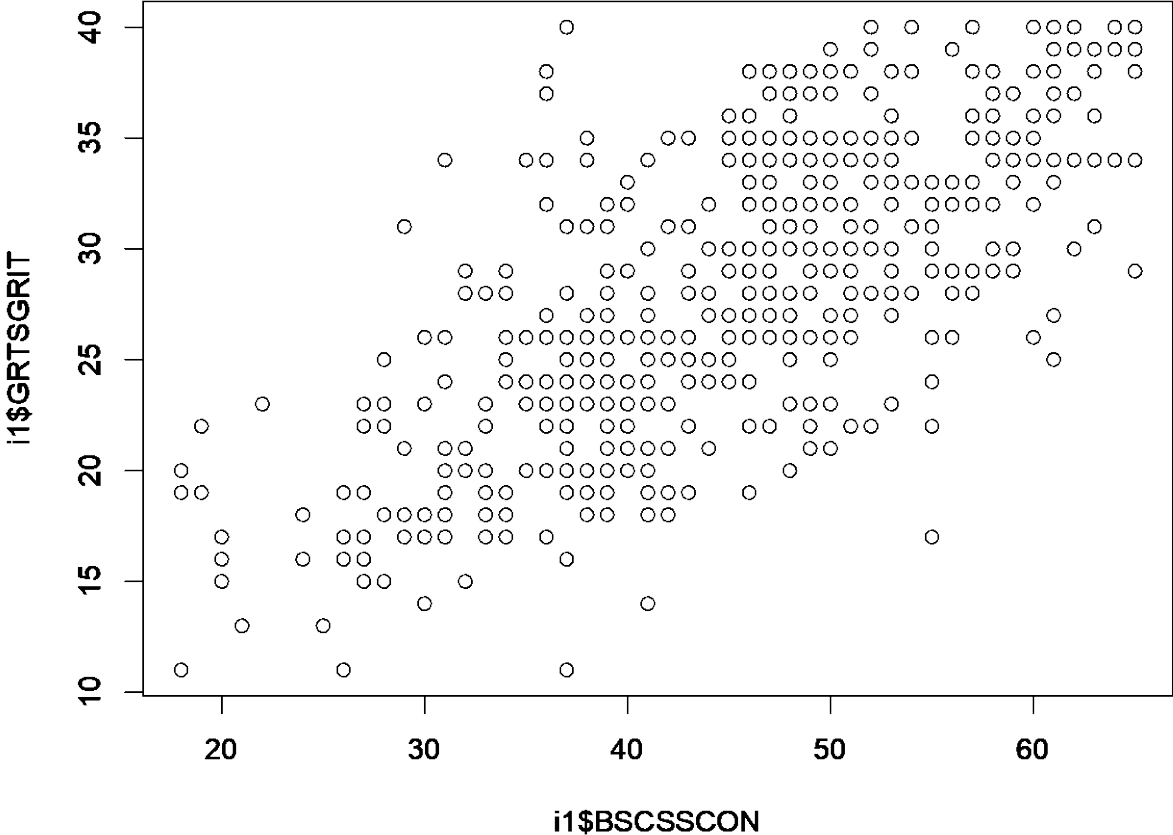

Figure B: Scatterplot for brief self-control questionnaire (x-axis) and grit (y-axis)

PSYCHOMETRIC EVALUATION OF THE GRIT-S

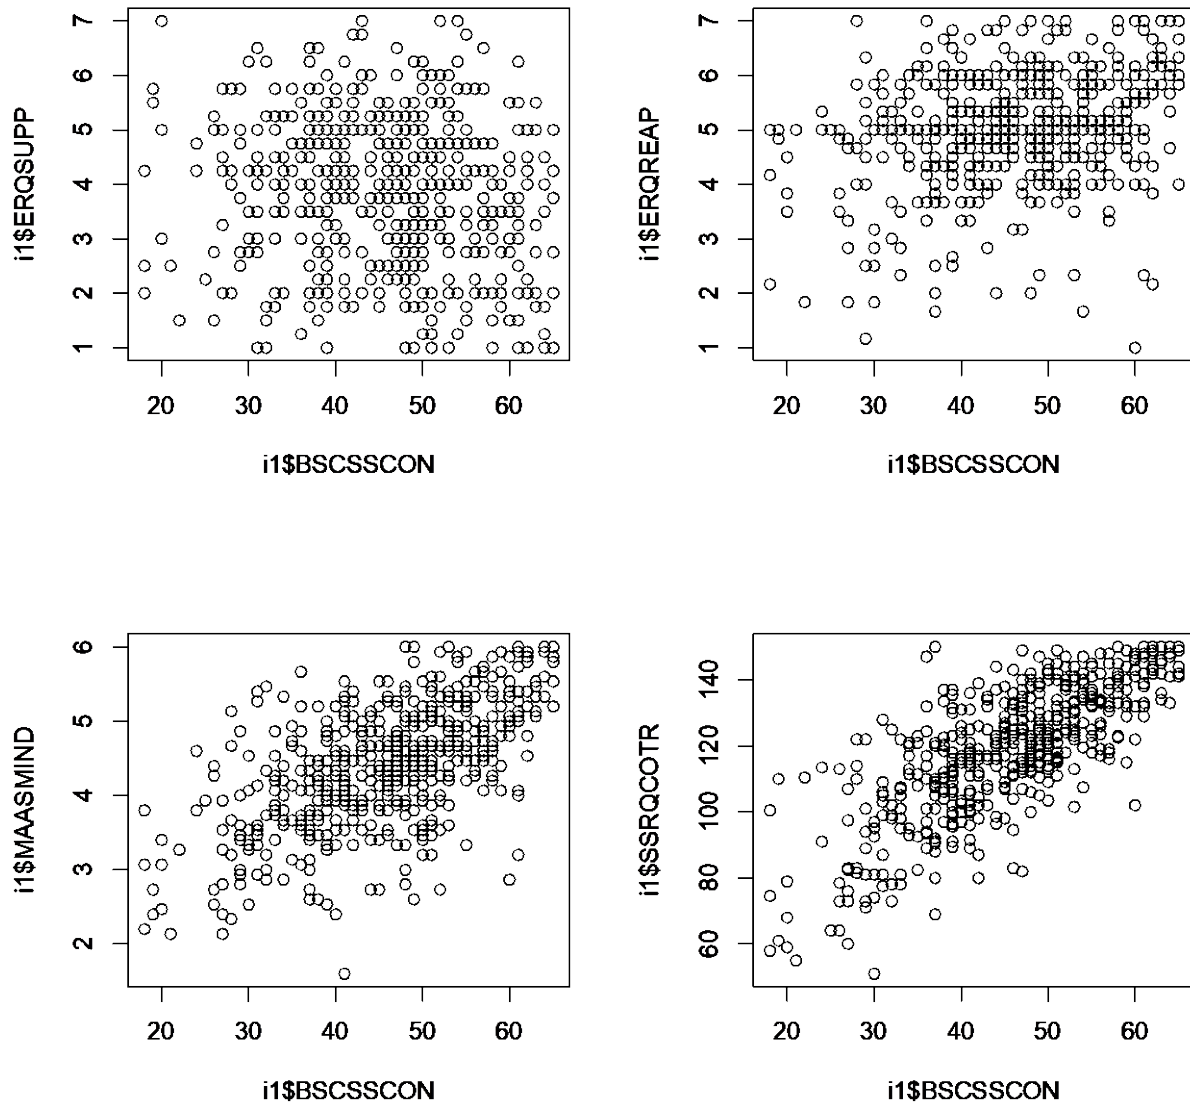

**Figure C:** Scatterplots for brief self-control and the extrinsic convergent validity outcomes – expressive suppression (top-left, ERQSUPP), cognitive reappraisal (top-right, ERQREAP), mindfulness (bottom-left, MAASMIND), and self-regulation (bottom-right, SSRQCOTR).

PSYCHOMETRIC EVALUATION OF THE GRIT-S

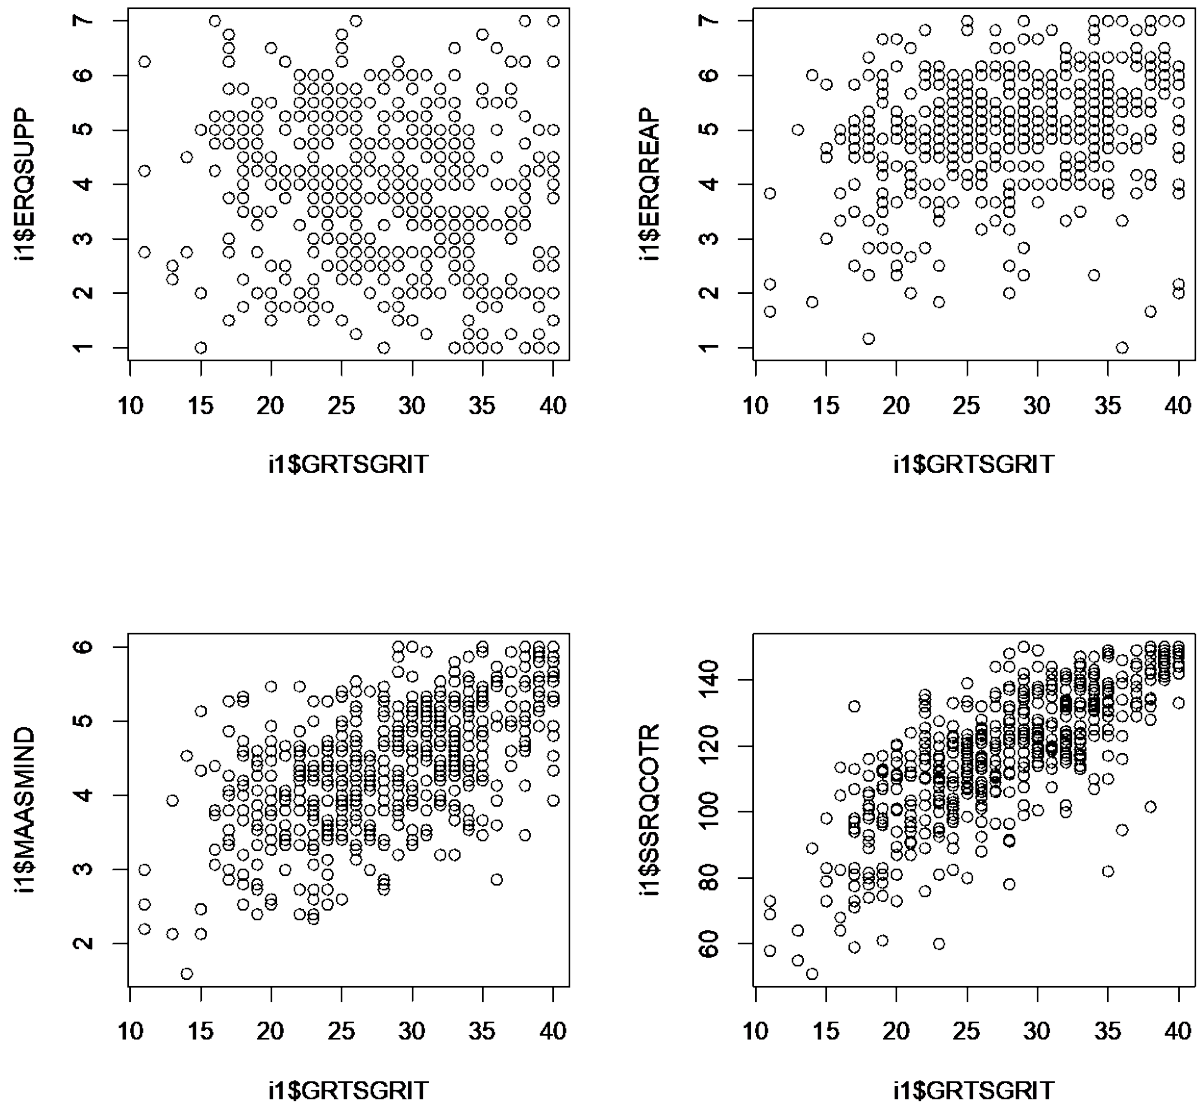

**Figure D.** Scatterplots for grit and the extrinsic convergent validity outcomes – expressive suppression (top-left, ERQSUPP), cognitive reappraisal (top-right, ERQREAP), mindfulness (bottom-left, MAASMIND), and self-regulation (bottom-right, SSRQCOTR).

# PSYCHOMETRIC EVALUATION OF THE GRIT-S

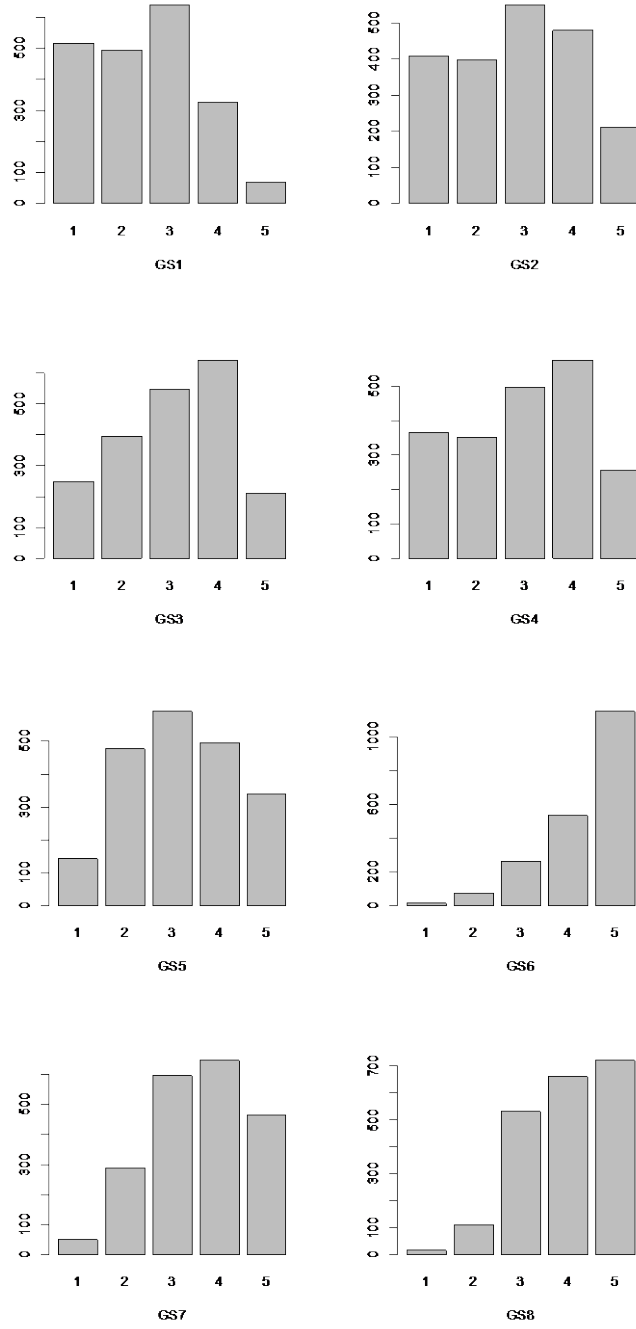

Figure E. Item frequency distributions for Sample 1

# PSYCHOMETRIC EVALUATION OF THE GRIT-S

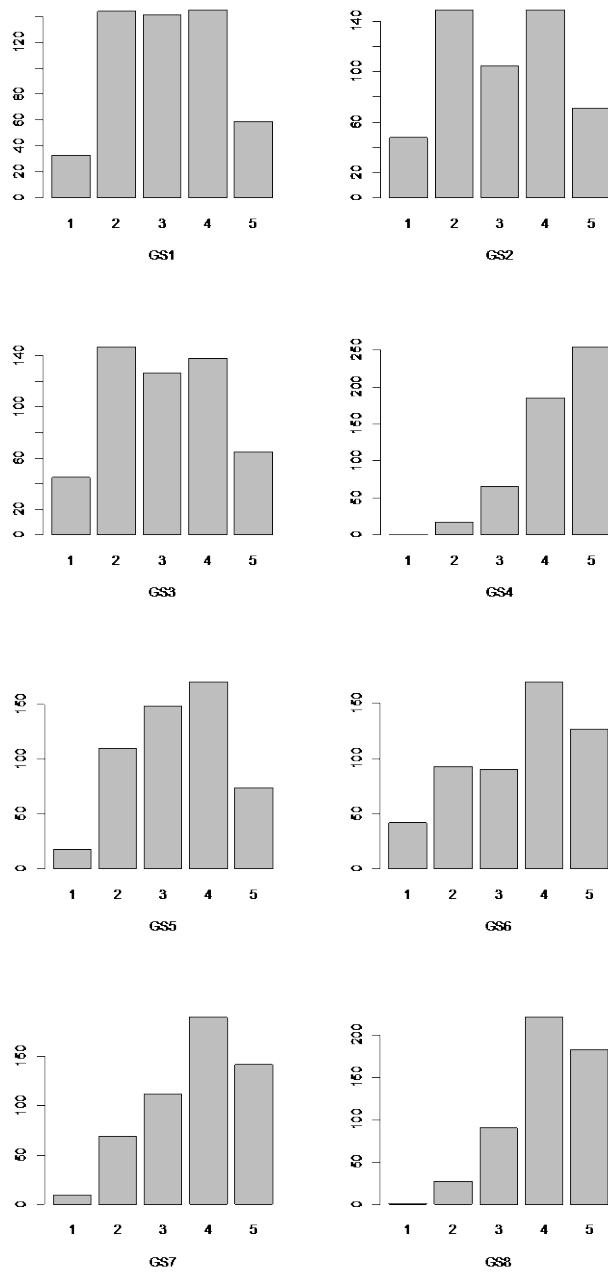

**Figure F.** Item frequency distributions for Sample 2.

**References**

- Cohen, J., Cohen, P., West, S. G., & Aiken, L. S. (2003). *Applied multiple regression/correlation analysis for the behavioral sciences* (3rd ed.). Mahwah, NJ: Erlbaum.
- Edwards, M. C., Houts, C. R., & Cai, L. (2018). A diagnostic procedure to detect departures from local independence in item response theory models. *Psychological Methods, 23*, 138-149
- Kang, T., & Chen, T. T. (2008). Performance of the generalized S-X2 item fit index for polytomous IRT models. *Journal of Educational Measurement, 45*(4), 391-406.
- Orlando, M., & Thissen, D. (2000). Likelihood-based item-fit indices for dichotomous item response theory models. *Applied Psychological Measurement, 24*(1), 50-64.
- Rosseel, Y. (2012). lavaan: An R Package for Structural Equation Modeling. *Journal of Statistical Software, 48*, 1-36

# PSYCHOMETRIC EVALUATION OF THE GRIT-S

## ESM: R inputs and outputs for analysis

```
#####  
Sample 1  
#####
```

```
#parallel analysis
```

```
library(lavaan)  
gr2=read.csv('data.csv',header=TRUE)  
l1=fa.parallel(gr2)  
plot(l1$pc.values,type='b',ylab='eigenvalue',main='Parallel Analysis Scree Plot - Study 1')  
abline(h=1)  
lines(l1$pc.sim,type='b',col='gray')
```

```
# Output is Figure A, left panel
```

```
#Recoding data and fitting a bifactor model
```

```
library(lavaan)  
  
gr3=reverse.code(c(1,1,1,1,-1,-1,-1,-1), gr2, mini = 1, maxi = 5)  
model_b2='  
f1=~GS2+GS5+GS7+GS8+GS4+GS6+GS9+GS12  
g1=~GS2+GS5+GS7+GS8  
g2=~GS4+GS6+GS9+GS12  
'  
  
colnames(gr3)=c('GS2','GS5','GS7','GS8','GS4','GS6','GS9','GS12')  
mfit2=cfa(model_b2,gr3,std.lv=T,orthogonal=TRUE)  
#summary(mfit2,standardized=TRUE)  
fitMeasures(mfit2)
```

|                     |                 |              |            |                   |                   |       |
|---------------------|-----------------|--------------|------------|-------------------|-------------------|-------|
| npar                | fmin            | chisq        | df         | pvalue            | baseline.chisq    |       |
| 24.000              | 0.015           | 59.418       | 12.000     | 0.000             | 4848.626          |       |
| baseline.df         | baseline.pvalue | cfi          | tli        | nnfi              | rfi               |       |
| 28.000              | 0.000           | 0.990        | 0.977      | 0.977             | 0.971             |       |
| nfi                 | pnfi            | ifi          | rni        | logl              | unrestricted.logl |       |
| 0.988               | 0.423           | 0.990        | 0.990      | -22596.697        | -22566.989        |       |
| aic                 | bic             | ntotal       | bic2       | rmsea             | rmsea.ci.lower    |       |
| 45241.395           | 45376.374       | 2047.000     | 45300.124  | 0.044             | 0.033             |       |
| rmsea.ci.upper      | rmsea.pvalue    | rmr          | rmr_nomean | srmr              | srmr_bentler      |       |
| 0.055               | 0.799           | 0.023        | 0.023      | 0.018             | 0.018             |       |
| srmr_bentler_nomean | crmrm           | crmrm_nomean | srmr_mplus | srmr_mplus_nomean |                   | cn_05 |
| 0.018               | 0.020           | 0.020        | 0.018      | 0.018             | 725.372           |       |
| cn_01               | gfi             | agfi         | pgfi       | mfi               | ecvi              |       |
| 904.204             | 0.993           | 0.978        | 0.331      | 0.988             | 0.052             |       |

PSYCHOMETRIC EVALUATION OF THE GRIT-S

#Unidimensional Model

```
model_b3='
f1=~GS2+GS5+GS7+GS8+GS4+GS6+GS9+GS12
'
mfituni=cfa(model_b3,gr3,std.lv=T)
summary(mfituni,standardized=T)
```

lavaan 0.6-3 ended normally after 15 iterations

|                           |         |       |  |
|---------------------------|---------|-------|--|
| Optimization method       | NLMINB  |       |  |
| Number of free parameters | 16      |       |  |
|                           | Used    | Total |  |
| Number of observations    | 2047    | 2073  |  |
| Estimator                 | ML      |       |  |
| Model Fit Test Statistic  | 568.957 |       |  |
| Degrees of freedom        | 20      |       |  |
| P-value (Chi-square)      | 0.000   |       |  |

Parameter Estimates:

|                                  |            |
|----------------------------------|------------|
| Information                      | Expected   |
| Information saturated (h1) model | Structured |
| Standard Errors                  | Standard   |

Latent Variables:

|       | Estimate | Std.Err | z-value | P(> z ) | Std.lv | Std.all |
|-------|----------|---------|---------|---------|--------|---------|
| f1 =~ |          |         |         |         |        |         |
| GS2   | 0.673    | 0.024   | 27.491  | 0.000   | 0.673  | 0.596   |
| GS5   | 0.850    | 0.027   | 31.706  | 0.000   | 0.850  | 0.668   |
| GS7   | 0.833    | 0.025   | 33.881  | 0.000   | 0.833  | 0.703   |
| GS8   | 0.978    | 0.026   | 37.373  | 0.000   | 0.978  | 0.757   |
| GS4   | 0.390    | 0.027   | 14.248  | 0.000   | 0.390  | 0.332   |
| GS6   | 0.448    | 0.020   | 22.200  | 0.000   | 0.448  | 0.498   |
| GS9   | 0.729    | 0.022   | 32.804  | 0.000   | 0.729  | 0.686   |
| GS12  | 0.520    | 0.021   | 24.678  | 0.000   | 0.520  | 0.545   |



## PSYCHOMETRIC EVALUATION OF THE GRIT-S

Variances:

|       | Estimate | Std.Err | z-value | P(> z ) | Std.lv | Std.all |
|-------|----------|---------|---------|---------|--------|---------|
| .GS2  | 0.821    | 0.029   | 28.710  | 0.000   | 0.821  | 0.644   |
| .GS5  | 0.895    | 0.033   | 27.170  | 0.000   | 0.895  | 0.553   |
| .GS7  | 0.709    | 0.027   | 26.129  | 0.000   | 0.709  | 0.506   |
| .GS8  | 0.714    | 0.030   | 23.957  | 0.000   | 0.714  | 0.428   |
| .GS4  | 1.226    | 0.039   | 31.260  | 0.000   | 1.226  | 0.889   |
| .GS6  | 0.611    | 0.020   | 30.043  | 0.000   | 0.611  | 0.752   |
| .GS9  | 0.598    | 0.022   | 26.670  | 0.000   | 0.598  | 0.529   |
| .GS12 | 0.640    | 0.022   | 29.485  | 0.000   | 0.640  | 0.703   |
| f1    | 1.000    |         |         | 1.000   | 1.000  |         |

PSYCHOMETRIC EVALUATION OF THE GRIT-S

#Unidimensional model with correlated residual

```
model_b4='
f1=~GS2+GS5+GS7+GS8+GS4+GS6+GS9+GS12
GS6~~GS12
'
```

```
mfituni2=cfa(model_b4,gr3,std.lv=T)
summary(mfituni2,standardized=T)
```

lavaan 0.6-3 ended normally after 16 iterations

|                           |         |       |  |
|---------------------------|---------|-------|--|
| Optimization method       | NLMINB  |       |  |
| Number of free parameters | 17      |       |  |
|                           | Used    | Total |  |
| Number of observations    | 2047    | 2073  |  |
| Estimator                 | ML      |       |  |
| Model Fit Test Statistic  | 296.306 |       |  |
| Degrees of freedom        | 19      |       |  |
| P-value (Chi-square)      | 0.000   |       |  |

Parameter Estimates:

|                                  |            |
|----------------------------------|------------|
| Information                      | Expected   |
| Information saturated (h1) model | Structured |
| Standard Errors                  | Standard   |

Latent Variables:

|       | Estimate | Std.Err | z-value | P(> z ) | Std.lv | Std.all |
|-------|----------|---------|---------|---------|--------|---------|
| f1 =~ |          |         |         |         |        |         |
| GS2   | 0.687    | 0.024   | 28.113  | 0.000   | 0.687  | 0.609   |
| GS5   | 0.867    | 0.027   | 32.425  | 0.000   | 0.867  | 0.682   |
| GS7   | 0.850    | 0.024   | 34.708  | 0.000   | 0.850  | 0.718   |
| GS8   | 0.988    | 0.026   | 37.748  | 0.000   | 0.988  | 0.764   |
| GS4   | 0.375    | 0.028   | 13.641  | 0.000   | 0.375  | 0.320   |
| GS6   | 0.405    | 0.021   | 19.697  | 0.000   | 0.405  | 0.450   |
| GS9   | 0.714    | 0.022   | 31.846  | 0.000   | 0.714  | 0.672   |
| GS12  | 0.480    | 0.021   | 22.364  | 0.000   | 0.480  | 0.503   |

Covariances:

|         | Estimate | Std.Err | z-value | P(> z ) | Std.lv | Std.all |
|---------|----------|---------|---------|---------|--------|---------|
| .GS6 ~~ |          |         |         |         |        |         |
| .GS12   | 0.247    | 0.017   | 14.663  | 0.000   | 0.247  | 0.371   |

PSYCHOMETRIC EVALUATION OF THE GRIT-S

Variances:

|       | Estimate | Std.Err | z-value | P(> z ) | Std.lv | Std.all |
|-------|----------|---------|---------|---------|--------|---------|
| .GS2  | 0.802    | 0.028   | 28.387  | 0.000   | 0.802  | 0.630   |
| .GS5  | 0.866    | 0.033   | 26.642  | 0.000   | 0.866  | 0.536   |
| .GS7  | 0.680    | 0.027   | 25.406  | 0.000   | 0.680  | 0.485   |
| .GS8  | 0.695    | 0.030   | 23.284  | 0.000   | 0.695  | 0.416   |
| .GS4  | 1.238    | 0.040   | 31.303  | 0.000   | 1.238  | 0.898   |
| .GS6  | 0.647    | 0.021   | 30.394  | 0.000   | 0.647  | 0.798   |
| .GS9  | 0.619    | 0.023   | 26.916  | 0.000   | 0.619  | 0.548   |
| .GS12 | 0.681    | 0.023   | 29.894  | 0.000   | 0.681  | 0.747   |
| f1    | 1.000    |         |         | 1.000   | 1.000  |         |

#Two factor congeneric model

```
model_b5='
g1=~GS2+GS5+GS7+GS8
g2=~GS4+GS6+GS9+GS12
g1~~g2
'
```

```
mfit2=cfa(model_b5,gr3,std.lv=T)
summary(mfit2,standardized=T)
```

lavaan 0.6-3 ended normally after 17 iterations

|                           |         |       |      |
|---------------------------|---------|-------|------|
| Optimization method       | NLMINB  |       |      |
| Number of free parameters | 17      |       |      |
|                           | Used    | Total |      |
| Number of observations    |         | 2047  | 2073 |
| Estimator                 | ML      |       |      |
| Model Fit Test Statistic  | 226.350 |       |      |
| Degrees of freedom        | 19      |       |      |
| P-value (Chi-square)      | 0.000   |       |      |

Parameter Estimates:

|                                  |            |
|----------------------------------|------------|
| Information                      | Expected   |
| Information saturated (h1) model | Structured |
| Standard Errors                  | Standard   |

Latent Variables:

|  | Estimate | Std.Err | z-value | P(> z ) | Std.lv | Std.all |
|--|----------|---------|---------|---------|--------|---------|
|--|----------|---------|---------|---------|--------|---------|

PSYCHOMETRIC EVALUATION OF THE GRIT-S

| g1 =~ |       |       |        |       |       |       |
|-------|-------|-------|--------|-------|-------|-------|
| GS2   | 0.697 | 0.025 | 28.395 | 0.000 | 0.697 | 0.618 |
| GS5   | 0.879 | 0.027 | 32.703 | 0.000 | 0.879 | 0.691 |
| GS7   | 0.876 | 0.025 | 35.689 | 0.000 | 0.876 | 0.739 |
| GS8   | 0.998 | 0.026 | 37.783 | 0.000 | 0.998 | 0.772 |
| g2 =~ |       |       |        |       |       |       |
| GS4   | 0.456 | 0.028 | 16.153 | 0.000 | 0.456 | 0.388 |
| GS6   | 0.555 | 0.020 | 27.208 | 0.000 | 0.555 | 0.616 |
| GS9   | 0.785 | 0.023 | 33.656 | 0.000 | 0.785 | 0.739 |
| GS12  | 0.633 | 0.021 | 29.693 | 0.000 | 0.633 | 0.664 |

Covariances:

|       | Estimate | Std.Err | z-value | P(> z ) | Std.lv | Std.all |
|-------|----------|---------|---------|---------|--------|---------|
| g1 ~~ |          |         |         |         |        |         |
| g2    | 0.746    | 0.017   | 42.637  | 0.000   | 0.746  | 0.746   |

Variances:

|       | Estimate | Std.Err | z-value | P(> z ) | Std.lv | Std.all |
|-------|----------|---------|---------|---------|--------|---------|
| .GS2  | 0.788    | 0.028   | 27.883  | 0.000   | 0.788  | 0.619   |
| .GS5  | 0.845    | 0.033   | 25.836  | 0.000   | 0.845  | 0.523   |
| .GS7  | 0.636    | 0.027   | 23.807  | 0.000   | 0.636  | 0.453   |
| .GS8  | 0.675    | 0.031   | 21.976  | 0.000   | 0.675  | 0.404   |
| .GS4  | 1.171    | 0.039   | 30.397  | 0.000   | 1.171  | 0.849   |
| .GS6  | 0.503    | 0.019   | 26.346  | 0.000   | 0.503  | 0.620   |
| .GS9  | 0.513    | 0.025   | 20.805  | 0.000   | 0.513  | 0.455   |
| .GS12 | 0.510    | 0.021   | 24.665  | 0.000   | 0.510  | 0.560   |
| g1    | 1.000    |         |         |         | 1.000  | 1.000   |
| g2    | 1.000    |         |         |         | 1.000  | 1.000   |

#Two factor noncongeneric model

fa(gr3,2)

Factor Analysis using method = minres

Call: fa(r = gr3, nfactors = 2)

Standardized loadings (pattern matrix) based upon correlation matrix

|     | MR1   | MR2   | h2   | u2   | com |
|-----|-------|-------|------|------|-----|
| GS2 | 0.67  | -0.07 | 0.40 | 0.60 | 1.0 |
| GS5 | 0.74  | -0.04 | 0.51 | 0.49 | 1.0 |
| GS7 | 0.75  | -0.02 | 0.54 | 0.46 | 1.0 |
| GS8 | 0.67  | 0.13  | 0.57 | 0.43 | 1.1 |
| GS4 | 0.05  | 0.35  | 0.15 | 0.85 | 1.0 |
| GS6 | -0.03 | 0.72  | 0.49 | 0.51 | 1.0 |
| GS9 | 0.40  | 0.39  | 0.50 | 0.50 | 2.0 |

## PSYCHOMETRIC EVALUATION OF THE GRIT-S

GS12 0.02 0.71 0.53 0.47 1.0

## PSYCHOMETRIC EVALUATION OF THE GRIT-S

#Partial Invariance Model for Gender

```
p3_mod2<-cfa(metric,data=gr6,group="gender",  
group.equal=c("loadings","intercepts"),group.partial = c("GS6~1","GS12~1"),missing='ml')  
summary(p3_mod2,fit.measures=T)
```

lavaan 0.6-3 ended normally after 47 iterations

|                                |        |
|--------------------------------|--------|
| Optimization method            | NLMINB |
| Number of free parameters      | 52     |
| Number of equality constraints | 14     |

|                                      |      |
|--------------------------------------|------|
| Number of observations per group     |      |
| 2                                    | 1387 |
| 1                                    | 660  |
| Number of missing patterns per group |      |
| 2                                    | 1    |
| 1                                    | 1    |

|                          |         |
|--------------------------|---------|
| Estimator                | ML      |
| Model Fit Test Statistic | 358.674 |
| Degrees of freedom       | 50      |
| P-value (Chi-square)     | 0.000   |

Chi-square for each group:

|   |         |
|---|---------|
| 2 | 217.651 |
| 1 | 141.023 |

Model test baseline model:

|                                 |          |
|---------------------------------|----------|
| Minimum Function Test Statistic | 4913.606 |
| Degrees of freedom              | 56       |
| P-value                         | 0.000    |

User model versus baseline model:

|                             |       |
|-----------------------------|-------|
| Comparative Fit Index (CFI) | 0.936 |
| Tucker-Lewis Index (TLI)    | 0.929 |

Loglikelihood and Information Criteria:

|                                       |            |
|---------------------------------------|------------|
| Loglikelihood user model (H0)         | -22672.582 |
| Loglikelihood unrestricted model (H1) | -22493.245 |

PSYCHOMETRIC EVALUATION OF THE GRIT-S

|                                     |           |
|-------------------------------------|-----------|
| Number of free parameters           | 38        |
| Akaike (AIC)                        | 45421.164 |
| Bayesian (BIC)                      | 45634.881 |
| Sample-size adjusted Bayesian (BIC) | 45514.152 |

Root Mean Square Error of Approximation:

|                                |             |
|--------------------------------|-------------|
| RMSEA                          | 0.078       |
| 90 Percent Confidence Interval | 0.070 0.085 |
| P-value RMSEA <= 0.05          | 0.000       |

Standardized Root Mean Square Residual:

|      |       |
|------|-------|
| SRMR | 0.052 |
|------|-------|

Parameter Estimates:

|                               |          |
|-------------------------------|----------|
| Information                   | Observed |
| Observed information based on | Hessian  |
| Standard Errors               | Standard |

Group 1 [2]:

Latent Variables:

|       |        | Estimate | Std.Err | z-value | P(> z ) |
|-------|--------|----------|---------|---------|---------|
| f1 =~ |        |          |         |         |         |
| GS2   | (.p1.) | 0.693    | 0.026   | 26.505  | 0.000   |
| GS5   | (.p2.) | 0.876    | 0.029   | 29.869  | 0.000   |
| GS7   | (.p3.) | 0.859    | 0.027   | 31.681  | 0.000   |
| GS8   | (.p4.) | 1.003    | 0.029   | 34.368  | 0.000   |
| GS4   | (.p5.) | 0.381    | 0.028   | 13.489  | 0.000   |
| GS6   | (.p6.) | 0.405    | 0.021   | 19.275  | 0.000   |
| GS9   | (.p7.) | 0.722    | 0.024   | 29.525  | 0.000   |
| GS12  | (.p8.) | 0.486    | 0.023   | 21.589  | 0.000   |

Covariances:

|       |    | Estimate | Std.Err | z-value | P(> z ) |
|-------|----|----------|---------|---------|---------|
| .GS6  | ~~ |          |         |         |         |
| .GS12 |    | 0.208    | 0.018   | 11.281  | 0.000   |

Intercepts:

|      |        | Estimate | Std.Err | z-value | P(> z ) |
|------|--------|----------|---------|---------|---------|
| .GS2 | (.19.) | 2.464    | 0.028   | 89.322  | 0.000   |
| .GS5 | (.20.) | 2.827    | 0.032   | 88.751  | 0.000   |

PSYCHOMETRIC EVALUATION OF THE GRIT-S

|       |        |       |       |         |       |
|-------|--------|-------|-------|---------|-------|
| .GS7  | (.21.) | 3.062 | 0.030 | 101.932 | 0.000 |
| .GS8  | (.22.) | 2.977 | 0.033 | 90.144  | 0.000 |
| .GS4  | (.23.) | 3.188 | 0.027 | 118.780 | 0.000 |
| .GS6  |        | 4.393 | 0.023 | 192.047 | 0.000 |
| .GS9  | (.25.) | 3.561 | 0.026 | 134.681 | 0.000 |
| .GS12 |        | 4.003 | 0.025 | 158.900 | 0.000 |
| f1    |        | 0.000 |       |         |       |

Variances:

|       |  | Estimate | Std.Err | z-value | P(> z ) |
|-------|--|----------|---------|---------|---------|
| f1    |  | 1.000    |         |         |         |
| .GS2  |  | 0.791    | 0.034   | 23.627  | 0.000   |
| .GS5  |  | 0.869    | 0.039   | 22.207  | 0.000   |
| .GS7  |  | 0.689    | 0.032   | 21.456  | 0.000   |
| .GS8  |  | 0.626    | 0.033   | 18.688  | 0.000   |
| .GS4  |  | 1.189    | 0.046   | 25.728  | 0.000   |
| .GS6  |  | 0.562    | 0.022   | 24.979  | 0.000   |
| .GS9  |  | 0.595    | 0.027   | 22.093  | 0.000   |
| .GS12 |  | 0.644    | 0.026   | 24.482  | 0.000   |

Group 2 [1]:

Latent Variables:

|      |        | Estimate | Std.Err | z-value | P(> z ) |
|------|--------|----------|---------|---------|---------|
| f1   | =~     |          |         |         |         |
| GS2  | (.p1.) | 0.693    | 0.026   | 26.505  | 0.000   |
| GS5  | (.p2.) | 0.876    | 0.029   | 29.869  | 0.000   |
| GS7  | (.p3.) | 0.859    | 0.027   | 31.681  | 0.000   |
| GS8  | (.p4.) | 1.003    | 0.029   | 34.368  | 0.000   |
| GS4  | (.p5.) | 0.381    | 0.028   | 13.489  | 0.000   |
| GS6  | (.p6.) | 0.405    | 0.021   | 19.275  | 0.000   |
| GS9  | (.p7.) | 0.722    | 0.024   | 29.525  | 0.000   |
| GS12 | (.p8.) | 0.486    | 0.023   | 21.589  | 0.000   |

Covariances:

|       |    | Estimate | Std.Err | z-value | P(> z ) |
|-------|----|----------|---------|---------|---------|
| .GS6  | ~~ |          |         |         |         |
| .GS12 |    | 0.305    | 0.034   | 8.884   | 0.000   |

Intercepts:

|      |        | Estimate | Std.Err | z-value | P(> z ) |
|------|--------|----------|---------|---------|---------|
| .GS2 | (.19.) | 2.464    | 0.028   | 89.322  | 0.000   |
| .GS5 | (.20.) | 2.827    | 0.032   | 88.751  | 0.000   |
| .GS7 | (.21.) | 3.062    | 0.030   | 101.932 | 0.000   |



## PSYCHOMETRIC EVALUATION OF THE GRIT-S

|       |        |       |       |         |       |
|-------|--------|-------|-------|---------|-------|
| .GS8  | (.22.) | 2.977 | 0.033 | 90.144  | 0.000 |
| .GS4  | (.23.) | 3.188 | 0.027 | 118.780 | 0.000 |
| .GS6  |        | 4.173 | 0.038 | 111.048 | 0.000 |
| .GS9  | (.25.) | 3.561 | 0.026 | 134.681 | 0.000 |
| .GS12 |        | 3.821 | 0.037 | 102.123 | 0.000 |
| f1    |        | 0.074 | 0.051 | 1.457   | 0.145 |

Variances:

|       | Estimate | Std.Err | z-value | P(> z ) |
|-------|----------|---------|---------|---------|
| f1    | 0.931    | 0.075   | 12.403  | 0.000   |
| .GS2  | 0.825    | 0.051   | 16.234  | 0.000   |
| .GS5  | 0.860    | 0.056   | 15.225  | 0.000   |
| .GS7  | 0.663    | 0.046   | 14.464  | 0.000   |
| .GS8  | 0.833    | 0.058   | 14.365  | 0.000   |
| .GS4  | 1.334    | 0.075   | 17.730  | 0.000   |
| .GS6  | 0.802    | 0.046   | 17.390  | 0.000   |
| .GS9  | 0.667    | 0.043   | 15.545  | 0.000   |
| .GS12 | 0.737    | 0.043   | 17.113  | 0.000   |

# PSYCHOMETRIC EVALUATION OF THE GRIT-S

#Partial Invariance Model for Education

```
config<-'
f1=~c(NA,NA,NA,NA)*GS2+GS5+GS7+GS8+GS4+GS6+GS9+GS12
f1~~c(1,NA,NA,NA)*f1
f1~c(0,NA,NA,NA)*1
GS12~~GS6
'

p2_mod3<-
cfa(config,data=gr6,group="education",missing="fiml",group.equal=c('loadings','intercepts'),group.par
tial=c('f1=~GS6','GS6~1','GS12~1','GS2~1'))
```

```
summary(p2_mod3,fit.measures=T,standardized=T)
```

lavaan 0.6-3 ended normally after 73 iterations

|                                |        |
|--------------------------------|--------|
| Optimization method            | NLMINB |
| Number of free parameters      | 106    |
| Number of equality constraints | 36     |

|                                      |     |
|--------------------------------------|-----|
| Number of observations per group     |     |
| 2                                    | 917 |
| 1                                    | 380 |
| 3                                    | 512 |
| 4                                    | 223 |
| Number of missing patterns per group |     |
| 2                                    | 1   |
| 1                                    | 1   |
| 3                                    | 1   |
| 4                                    | 1   |

|                          |         |
|--------------------------|---------|
| Estimator                | ML      |
| Model Fit Test Statistic | 420.421 |
| Degrees of freedom       | 106     |
| P-value (Chi-square)     | 0.000   |

Chi-square for each group:

|   |         |
|---|---------|
| 2 | 170.272 |
| 1 | 81.509  |
| 3 | 102.610 |
| 4 | 66.031  |

Model test baseline model:

PSYCHOMETRIC EVALUATION OF THE GRIT-S

Minimum Function Test Statistic 4666.955  
 Degrees of freedom 112  
 P-value 0.000

User model versus baseline model:

Comparative Fit Index (CFI) 0.931  
 Tucker-Lewis Index (TLI) 0.927

Loglikelihood and Information Criteria:

Loglikelihood user model (H0) -22422.175  
 Loglikelihood unrestricted model (H1) -22211.965

Number of free parameters 70  
 Akaike (AIC) 44984.351  
 Bayesian (BIC) 45377.525  
 Sample-size adjusted Bayesian (BIC) 45155.130

Root Mean Square Error of Approximation:

RMSEA 0.076  
 90 Percent Confidence Interval 0.069 0.084  
 P-value RMSEA <= 0.05 0.000

Standardized Root Mean Square Residual:

SRMR 0.058

Parameter Estimates:

Information Observed  
 Observed information based on Hessian  
 Standard Errors Standard

Group 1 [2]:

Latent Variables:

|     |        | Estimate | Std.Err | z-value | P(> z ) | Std.lv | Std.all |
|-----|--------|----------|---------|---------|---------|--------|---------|
| f1  | ~      |          |         |         |         |        |         |
| GS2 | (.p1.) | 0.701    | 0.029   | 24.485  | 0.000   | 0.701  | 0.626   |
| GS5 | (.p2.) | 0.862    | 0.032   | 26.915  | 0.000   | 0.862  | 0.670   |
| GS7 | (.p3.) | 0.838    | 0.030   | 27.846  | 0.000   | 0.838  | 0.693   |

PSYCHOMETRIC EVALUATION OF THE GRIT-S

|      |        |       |       |        |       |       |       |
|------|--------|-------|-------|--------|-------|-------|-------|
| GS8  | (.p4.) | 0.977 | 0.033 | 29.691 | 0.000 | 0.977 | 0.760 |
| GS4  | (.p5.) | 0.368 | 0.029 | 12.918 | 0.000 | 0.368 | 0.312 |
| GS6  |        | 0.430 | 0.031 | 13.832 | 0.000 | 0.430 | 0.462 |
| GS9  | (.p7.) | 0.696 | 0.027 | 25.766 | 0.000 | 0.696 | 0.656 |
| GS12 | (.p8.) | 0.444 | 0.024 | 18.571 | 0.000 | 0.444 | 0.455 |

Covariances:

|       |    | Estimate | Std.Err | z-value | P(> z ) | Std.lv | Std.all |
|-------|----|----------|---------|---------|---------|--------|---------|
| .GS6  | ~~ |          |         |         |         |        |         |
| .GS12 |    | 0.244    | 0.027   | 9.073   | 0.000   | 0.244  | 0.340   |

Intercepts:

|       |        | Estimate | Std.Err | z-value | P(> z ) | Std.lv | Std.all |
|-------|--------|----------|---------|---------|---------|--------|---------|
| f1    |        | 0.000    |         |         | 0.000   | 0.000  |         |
| .GS2  |        | 2.497    | 0.037   | 67.490  | 0.000   | 2.497  | 2.229   |
| .GS5  | (.21.) | 2.725    | 0.037   | 73.899  | 0.000   | 2.725  | 2.119   |
| .GS7  | (.22.) | 2.959    | 0.035   | 84.407  | 0.000   | 2.959  | 2.445   |
| .GS8  | (.23.) | 2.865    | 0.039   | 73.039  | 0.000   | 2.865  | 2.229   |
| .GS4  | (.24.) | 3.152    | 0.028   | 111.962 | 0.000   | 3.152  | 2.667   |
| .GS6  |        | 4.285    | 0.031   | 139.318 | 0.000   | 4.285  | 4.601   |
| .GS9  | (.26.) | 3.480    | 0.030   | 114.839 | 0.000   | 3.480  | 3.280   |
| .GS12 |        | 3.846    | 0.032   | 119.295 | 0.000   | 3.846  | 3.939   |

Variances:

|       |  | Estimate | Std.Err | z-value | P(> z ) | Std.lv | Std.all |
|-------|--|----------|---------|---------|---------|--------|---------|
| f1    |  | 1.000    |         |         | 1.000   | 1.000  |         |
| .GS2  |  | 0.764    | 0.040   | 18.923  | 0.000   | 0.764  | 0.608   |
| .GS5  |  | 0.911    | 0.050   | 18.228  | 0.000   | 0.911  | 0.551   |
| .GS7  |  | 0.761    | 0.043   | 17.769  | 0.000   | 0.761  | 0.520   |
| .GS8  |  | 0.699    | 0.044   | 15.933  | 0.000   | 0.699  | 0.423   |
| .GS4  |  | 1.261    | 0.060   | 20.936  | 0.000   | 1.261  | 0.903   |
| .GS6  |  | 0.683    | 0.034   | 20.129  | 0.000   | 0.683  | 0.787   |
| .GS9  |  | 0.641    | 0.036   | 18.038  | 0.000   | 0.641  | 0.569   |
| .GS12 |  | 0.756    | 0.037   | 20.259  | 0.000   | 0.756  | 0.793   |

Group 2 [1]:

Latent Variables:

|     |        | Estimate | Std.Err | z-value | P(> z ) | Std.lv | Std.all |
|-----|--------|----------|---------|---------|---------|--------|---------|
| f1  | =~     |          |         |         |         |        |         |
| GS2 | (.p1.) | 0.701    | 0.029   | 24.485  | 0.000   | 0.649  | 0.578   |
| GS5 | (.p2.) | 0.862    | 0.032   | 26.915  | 0.000   | 0.797  | 0.619   |
| GS7 | (.p3.) | 0.838    | 0.030   | 27.846  | 0.000   | 0.776  | 0.673   |
| GS8 | (.p4.) | 0.977    | 0.033   | 29.691  | 0.000   | 0.904  | 0.722   |

PSYCHOMETRIC EVALUATION OF THE GRIT-S

|             |       |       |        |       |       |       |
|-------------|-------|-------|--------|-------|-------|-------|
| GS4 (.p5.)  | 0.368 | 0.029 | 12.918 | 0.000 | 0.341 | 0.308 |
| GS6         | 0.480 | 0.052 | 9.146  | 0.000 | 0.444 | 0.467 |
| GS9 (.p7.)  | 0.696 | 0.027 | 25.766 | 0.000 | 0.644 | 0.632 |
| GS12 (.p8.) | 0.444 | 0.024 | 18.571 | 0.000 | 0.411 | 0.459 |

Covariances:

|         | Estimate | Std.Err | z-value | P(> z ) | Std.lv | Std.all |
|---------|----------|---------|---------|---------|--------|---------|
| .GS6 ~~ |          |         |         |         |        |         |
| .GS12   | 0.242    | 0.039   | 6.138   | 0.000   | 0.242  | 0.363   |

Intercepts:

|             | Estimate | Std.Err | z-value | P(> z ) | Std.lv | Std.all |
|-------------|----------|---------|---------|---------|--------|---------|
| f1          | -0.097   | 0.066   | -1.483  | 0.138   | -0.105 | -0.105  |
| .GS2        | 2.342    | 0.057   | 41.273  | 0.000   | 2.342  | 2.087   |
| .GS5 (.21.) | 2.725    | 0.037   | 73.899  | 0.000   | 2.725  | 2.115   |
| .GS7 (.22.) | 2.959    | 0.035   | 84.407  | 0.000   | 2.959  | 2.569   |
| .GS8 (.23.) | 2.865    | 0.039   | 73.039  | 0.000   | 2.865  | 2.288   |
| .GS4 (.24.) | 3.152    | 0.028   | 111.962 | 0.000   | 3.152  | 2.849   |
| .GS6        | 4.210    | 0.049   | 86.774  | 0.000   | 4.210  | 4.431   |
| .GS9 (.26.) | 3.480    | 0.030   | 114.839 | 0.000   | 3.480  | 3.416   |
| .GS12       | 3.791    | 0.045   | 83.340  | 0.000   | 3.791  | 4.239   |

Variances:

|       | Estimate | Std.Err | z-value | P(> z ) | Std.lv | Std.all |
|-------|----------|---------|---------|---------|--------|---------|
| f1    | 0.856    | 0.092   | 9.334   | 0.000   | 1.000  | 1.000   |
| .GS2  | 0.838    | 0.068   | 12.380  | 0.000   | 0.838  | 0.666   |
| .GS5  | 1.025    | 0.085   | 12.020  | 0.000   | 1.025  | 0.617   |
| .GS7  | 0.725    | 0.063   | 11.457  | 0.000   | 0.725  | 0.547   |
| .GS8  | 0.751    | 0.071   | 10.606  | 0.000   | 0.751  | 0.479   |
| .GS4  | 1.108    | 0.082   | 13.468  | 0.000   | 1.108  | 0.905   |
| .GS6  | 0.706    | 0.055   | 12.813  | 0.000   | 0.706  | 0.781   |
| .GS9  | 0.623    | 0.053   | 11.854  | 0.000   | 0.623  | 0.600   |
| .GS12 | 0.631    | 0.049   | 12.989  | 0.000   | 0.631  | 0.789   |

Group 3 [3]:

Latent Variables:

|            | Estimate | Std.Err | z-value | P(> z ) | Std.lv | Std.all |
|------------|----------|---------|---------|---------|--------|---------|
| f1 =~      |          |         |         |         |        |         |
| GS2 (.p1.) | 0.701    | 0.029   | 24.485  | 0.000   | 0.715  | 0.633   |
| GS5 (.p2.) | 0.862    | 0.032   | 26.915  | 0.000   | 0.879  | 0.718   |
| GS7 (.p3.) | 0.838    | 0.030   | 27.846  | 0.000   | 0.855  | 0.754   |
| GS8 (.p4.) | 0.977    | 0.033   | 29.691  | 0.000   | 0.996  | 0.764   |
| GS4 (.p5.) | 0.368    | 0.029   | 12.918  | 0.000   | 0.376  | 0.315   |

PSYCHOMETRIC EVALUATION OF THE GRIT-S

|      |        |       |       |        |       |       |       |
|------|--------|-------|-------|--------|-------|-------|-------|
| GS6  |        | 0.311 | 0.036 | 8.722  | 0.000 | 0.317 | 0.376 |
| GS9  | (.p7.) | 0.696 | 0.027 | 25.766 | 0.000 | 0.710 | 0.661 |
| GS12 | (.p8.) | 0.444 | 0.024 | 18.571 | 0.000 | 0.453 | 0.491 |

Covariances:

|       |    | Estimate | Std.Err | z-value | P(> z ) | Std.lv | Std.all |
|-------|----|----------|---------|---------|---------|--------|---------|
| .GS6  | ~~ |          |         |         |         |        |         |
| .GS12 |    | 0.272    | 0.032   | 8.549   | 0.000   | 0.272  | 0.433   |

Intercepts:

|       |        | Estimate | Std.Err | z-value | P(> z ) | Std.lv | Std.all |
|-------|--------|----------|---------|---------|---------|--------|---------|
| f1    |        | 0.358    | 0.063   | 5.696   | 0.000   | 0.351  | 0.351   |
| .GS2  |        | 2.298    | 0.050   | 46.306  | 0.000   | 2.298  | 2.032   |
| .GS5  | (.21.) | 2.725    | 0.037   | 73.899  | 0.000   | 2.725  | 2.228   |
| .GS7  | (.22.) | 2.959    | 0.035   | 84.407  | 0.000   | 2.959  | 2.609   |
| .GS8  | (.23.) | 2.865    | 0.039   | 73.039  | 0.000   | 2.865  | 2.198   |
| .GS4  | (.24.) | 3.152    | 0.028   | 111.962 | 0.000   | 3.152  | 2.647   |
| .GS6  |        | 4.322    | 0.039   | 110.784 | 0.000   | 4.322  | 5.125   |
| .GS9  | (.26.) | 3.480    | 0.030   | 114.839 | 0.000   | 3.480  | 3.241   |
| .GS12 |        | 3.982    | 0.041   | 97.247  | 0.000   | 3.982  | 4.317   |

Variances:

|       |  | Estimate | Std.Err | z-value | P(> z ) | Std.lv | Std.all |
|-------|--|----------|---------|---------|---------|--------|---------|
| f1    |  | 1.040    | 0.097   | 10.752  | 0.000   | 1.000  | 1.000   |
| .GS2  |  | 0.767    | 0.054   | 14.252  | 0.000   | 0.767  | 0.600   |
| .GS5  |  | 0.724    | 0.056   | 13.048  | 0.000   | 0.724  | 0.484   |
| .GS7  |  | 0.555    | 0.044   | 12.507  | 0.000   | 0.555  | 0.432   |
| .GS8  |  | 0.707    | 0.057   | 12.433  | 0.000   | 0.707  | 0.416   |
| .GS4  |  | 1.277    | 0.081   | 15.721  | 0.000   | 1.277  | 0.901   |
| .GS6  |  | 0.611    | 0.039   | 15.527  | 0.000   | 0.611  | 0.859   |
| .GS9  |  | 0.649    | 0.046   | 13.994  | 0.000   | 0.649  | 0.563   |
| .GS12 |  | 0.646    | 0.043   | 15.151  | 0.000   | 0.646  | 0.759   |

Group 4 [4]:

Latent Variables:

|     |        | Estimate | Std.Err | z-value | P(> z ) | Std.lv | Std.all |
|-----|--------|----------|---------|---------|---------|--------|---------|
| f1  | ==     |          |         |         |         |        |         |
| GS2 | (.p1.) | 0.701    | 0.029   | 24.485  | 0.000   | 0.642  | 0.579   |
| GS5 | (.p2.) | 0.862    | 0.032   | 26.915  | 0.000   | 0.789  | 0.686   |
| GS7 | (.p3.) | 0.838    | 0.030   | 27.846  | 0.000   | 0.767  | 0.715   |
| GS8 | (.p4.) | 0.977    | 0.033   | 29.691  | 0.000   | 0.894  | 0.776   |
| GS4 | (.p5.) | 0.368    | 0.029   | 12.918  | 0.000   | 0.337  | 0.284   |
| GS6 |        | 0.241    | 0.048   | 4.991   | 0.000   | 0.220  | 0.328   |

PSYCHOMETRIC EVALUATION OF THE GRIT-S

|             |       |       |        |       |       |       |
|-------------|-------|-------|--------|-------|-------|-------|
| GS9 (.p7.)  | 0.696 | 0.027 | 25.766 | 0.000 | 0.637 | 0.658 |
| GS12 (.p8.) | 0.444 | 0.024 | 18.571 | 0.000 | 0.406 | 0.491 |

Covariances:

|         | Estimate | Std.Err | z-value | P(> z ) | Std.lv | Std.all |
|---------|----------|---------|---------|---------|--------|---------|
| .GS6 ~~ |          |         |         |         |        |         |
| .GS12   | 0.175    | 0.034   | 5.101   | 0.000   | 0.175  | 0.383   |

Intercepts:

|             | Estimate | Std.Err | z-value | P(> z ) | Std.lv | Std.all |
|-------------|----------|---------|---------|---------|--------|---------|
| f1          | 0.665    | 0.080   | 8.323   | 0.000   | 0.727  | 0.727   |
| .GS2        | 2.139    | 0.071   | 30.148  | 0.000   | 2.139  | 1.930   |
| .GS5 (.21.) | 2.725    | 0.037   | 73.899  | 0.000   | 2.725  | 2.371   |
| .GS7 (.22.) | 2.959    | 0.035   | 84.407  | 0.000   | 2.959  | 2.757   |
| .GS8 (.23.) | 2.865    | 0.039   | 73.039  | 0.000   | 2.865  | 2.487   |
| .GS4 (.24.) | 3.152    | 0.028   | 111.962 | 0.000   | 3.152  | 2.659   |
| .GS6        | 4.459    | 0.054   | 82.094  | 0.000   | 4.459  | 6.631   |
| .GS9 (.26.) | 3.480    | 0.030   | 114.839 | 0.000   | 3.480  | 3.592   |
| .GS12       | 4.055    | 0.055   | 74.247  | 0.000   | 4.055  | 4.898   |

Variances:

|       | Estimate | Std.Err | z-value | P(> z ) | Std.lv | Std.all |
|-------|----------|---------|---------|---------|--------|---------|
| f1    | 0.838    | 0.107   | 7.863   | 0.000   | 1.000  | 1.000   |
| .GS2  | 0.816    | 0.085   | 9.597   | 0.000   | 0.816  | 0.664   |
| .GS5  | 0.700    | 0.079   | 8.909   | 0.000   | 0.700  | 0.529   |
| .GS7  | 0.563    | 0.065   | 8.633   | 0.000   | 0.563  | 0.489   |
| .GS8  | 0.528    | 0.068   | 7.716   | 0.000   | 0.528  | 0.398   |
| .GS4  | 1.292    | 0.124   | 10.402  | 0.000   | 1.292  | 0.919   |
| .GS6  | 0.404    | 0.039   | 10.331  | 0.000   | 0.404  | 0.893   |
| .GS9  | 0.532    | 0.058   | 9.155   | 0.000   | 0.532  | 0.567   |
| .GS12 | 0.520    | 0.052   | 9.996   | 0.000   | 0.520  | 0.759   |

## PSYCHOMETRIC EVALUATION OF THE GRIT-S

#Partial Invariance Model for Race

```
p3_mod<-  
cfa(config,data=gr7,group="race",missing="fiml",group.equal=c('loadings','intercepts'),group.partial=  
GS4~1')
```

Warning message:

```
In lav_data_full(data = data, group = group, cluster = cluster, :  
lavaan WARNING: group variable 'race' contains missing values
```

```
summary(p3_mod,fit.measures=T,standardized=T)
```

lavaan 0.6-3 ended normally after 77 iterations

|                                |        |
|--------------------------------|--------|
| Optimization method            | NLMINB |
| Number of free parameters      | 106    |
| Number of equality constraints | 45     |

|                                  |      |
|----------------------------------|------|
| Number of observations per group |      |
| 4                                | 1435 |
| 1                                | 168  |
| 3                                | 157  |
| 5                                | 265  |

|                                      |   |
|--------------------------------------|---|
| Number of missing patterns per group |   |
| 4                                    | 1 |
| 1                                    | 1 |
| 3                                    | 1 |
| 5                                    | 1 |

|                          |         |
|--------------------------|---------|
| Estimator                | ML      |
| Model Fit Test Statistic | 429.963 |
| Degrees of freedom       | 115     |
| P-value (Chi-square)     | 0.000   |

Chi-square for each group:

|   |         |
|---|---------|
| 4 | 199.936 |
| 1 | 76.136  |
| 3 | 66.333  |
| 5 | 87.558  |

Model test baseline model:

|                                 |          |
|---------------------------------|----------|
| Minimum Function Test Statistic | 4919.335 |
|---------------------------------|----------|



PSYCHOMETRIC EVALUATION OF THE GRIT-S

Degrees of freedom 112  
 P-value 0.000

User model versus baseline model:

Comparative Fit Index (CFI) 0.934  
 Tucker-Lewis Index (TLI) 0.936

Loglikelihood and Information Criteria:

Loglikelihood user model (H0) -22415.352  
 Loglikelihood unrestricted model (H1) -22200.370

Number of free parameters 61  
 Akaike (AIC) 44952.703  
 Bayesian (BIC) 45295.116  
 Sample-size adjusted Bayesian (BIC) 45101.315

Root Mean Square Error of Approximation:

RMSEA 0.074  
 90 Percent Confidence Interval 0.066 0.081  
 P-value RMSEA <= 0.05 0.000

Standardized Root Mean Square Residual:

SRMR 0.056

Parameter Estimates:

Information Observed  
 Observed information based on Hessian  
 Standard Errors Standard

Group 1 [4]:

Latent Variables:

|     |        | Estimate | Std.Err | z-value | P(> z ) | Std.lv | Std.all |
|-----|--------|----------|---------|---------|---------|--------|---------|
| f1  | =~     |          |         |         |         |        |         |
| GS2 | (.p1.) | 0.690    | 0.026   | 26.953  | 0.000   | 0.690  | 0.627   |
| GS5 | (.p2.) | 0.862    | 0.029   | 29.996  | 0.000   | 0.862  | 0.687   |
| GS7 | (.p3.) | 0.846    | 0.027   | 31.917  | 0.000   | 0.846  | 0.730   |
| GS8 | (.p4.) | 0.985    | 0.029   | 34.106  | 0.000   | 0.985  | 0.759   |
| GS4 | (.p5.) | 0.377    | 0.028   | 13.378  | 0.000   | 0.377  | 0.325   |

PSYCHOMETRIC EVALUATION OF THE GRIT-S

|      |        |       |       |        |       |       |       |
|------|--------|-------|-------|--------|-------|-------|-------|
| GS6  | (.p6.) | 0.401 | 0.021 | 19.096 | 0.000 | 0.401 | 0.456 |
| GS9  | (.p7.) | 0.709 | 0.024 | 29.454 | 0.000 | 0.709 | 0.673 |
| GS12 | (.p8.) | 0.481 | 0.022 | 21.603 | 0.000 | 0.481 | 0.507 |

Covariances:

|       |    | Estimate | Std.Err | z-value | P(> z ) | Std.lv | Std.all |
|-------|----|----------|---------|---------|---------|--------|---------|
| .GS6  | ~~ |          |         |         |         |        |         |
| .GS12 |    | 0.255    | 0.020   | 13.017  | 0.000   | 0.255  | 0.398   |

Intercepts:

|       |        | Estimate | Std.Err | z-value | P(> z ) | Std.lv | Std.all |
|-------|--------|----------|---------|---------|---------|--------|---------|
| f1    |        | 0.000    |         | 0.000   | 0.000   | 0.000  |         |
| .GS2  | (.20.) | 2.453    | 0.027   | 90.329  | 0.000   | 2.453  | 2.227   |
| .GS5  | (.21.) | 2.812    | 0.031   | 90.243  | 0.000   | 2.812  | 2.242   |
| .GS7  | (.22.) | 3.055    | 0.029   | 104.647 | 0.000   | 3.055  | 2.637   |
| .GS8  | (.23.) | 2.961    | 0.033   | 90.719  | 0.000   | 2.961  | 2.283   |
| .GS4  |        | 3.181    | 0.031   | 104.011 | 0.000   | 3.181  | 2.746   |
| .GS6  | (.25.) | 4.327    | 0.021   | 207.692 | 0.000   | 4.327  | 4.920   |
| .GS9  | (.26.) | 3.548    | 0.026   | 136.578 | 0.000   | 3.548  | 3.370   |
| .GS12 | (.27.) | 3.943    | 0.022   | 175.546 | 0.000   | 3.943  | 4.156   |

Variances:

|       |  | Estimate | Std.Err | z-value | P(> z ) | Std.lv | Std.all |
|-------|--|----------|---------|---------|---------|--------|---------|
| f1    |  | 1.000    |         | 1.000   | 1.000   | 1.000  |         |
| .GS2  |  | 0.736    | 0.031   | 23.640  | 0.000   | 0.736  | 0.607   |
| .GS5  |  | 0.830    | 0.037   | 22.352  | 0.000   | 0.830  | 0.528   |
| .GS7  |  | 0.627    | 0.030   | 21.036  | 0.000   | 0.627  | 0.467   |
| .GS8  |  | 0.712    | 0.035   | 20.204  | 0.000   | 0.712  | 0.423   |
| .GS4  |  | 1.201    | 0.046   | 26.207  | 0.000   | 1.201  | 0.894   |
| .GS6  |  | 0.613    | 0.024   | 25.488  | 0.000   | 0.613  | 0.792   |
| .GS9  |  | 0.606    | 0.027   | 22.588  | 0.000   | 0.606  | 0.546   |
| .GS12 |  | 0.669    | 0.027   | 24.985  | 0.000   | 0.669  | 0.743   |

Group 2 [1]:

Latent Variables:

|     |        | Estimate | Std.Err | z-value | P(> z ) | Std.lv | Std.all |
|-----|--------|----------|---------|---------|---------|--------|---------|
| f1  | ==     |          |         |         |         |        |         |
| GS2 | (.p1.) | 0.690    | 0.026   | 26.953  | 0.000   | 0.682  | 0.581   |
| GS5 | (.p2.) | 0.862    | 0.029   | 29.996  | 0.000   | 0.851  | 0.653   |
| GS7 | (.p3.) | 0.846    | 0.027   | 31.917  | 0.000   | 0.835  | 0.706   |
| GS8 | (.p4.) | 0.985    | 0.029   | 34.106  | 0.000   | 0.972  | 0.755   |
| GS4 | (.p5.) | 0.377    | 0.028   | 13.378  | 0.000   | 0.372  | 0.315   |
| GS6 | (.p6.) | 0.401    | 0.021   | 19.096  | 0.000   | 0.396  | 0.396   |

PSYCHOMETRIC EVALUATION OF THE GRIT-S

|      |        |       |       |        |       |       |       |
|------|--------|-------|-------|--------|-------|-------|-------|
| GS9  | (.p7.) | 0.709 | 0.024 | 29.454 | 0.000 | 0.700 | 0.654 |
| GS12 | (.p8.) | 0.481 | 0.022 | 21.603 | 0.000 | 0.475 | 0.498 |

Covariances:

|       |    | Estimate | Std.Err | z-value | P(> z ) | Std.lv | Std.all |
|-------|----|----------|---------|---------|---------|--------|---------|
| .GS6  | ~~ |          |         |         |         |        |         |
| .GS12 |    | 0.395    | 0.071   | 5.601   | 0.000   | 0.395  | 0.519   |

Intercepts:

|       |        | Estimate | Std.Err | z-value | P(> z ) | Std.lv | Std.all |
|-------|--------|----------|---------|---------|---------|--------|---------|
| f1    |        | 0.090    | 0.089   | 1.015   | 0.310   | 0.091  | 0.091   |
| .GS2  | (.20.) | 2.453    | 0.027   | 90.329  | 0.000   | 2.453  | 2.091   |
| .GS5  | (.21.) | 2.812    | 0.031   | 90.243  | 0.000   | 2.812  | 2.157   |
| .GS7  | (.22.) | 3.055    | 0.029   | 104.647 | 0.000   | 3.055  | 2.583   |
| .GS8  | (.23.) | 2.961    | 0.033   | 90.719  | 0.000   | 2.961  | 2.299   |
| .GS4  |        | 3.073    | 0.088   | 34.856  | 0.000   | 3.073  | 2.604   |
| .GS6  | (.25.) | 4.327    | 0.021   | 207.692 | 0.000   | 4.327  | 4.321   |
| .GS9  | (.26.) | 3.548    | 0.026   | 136.578 | 0.000   | 3.548  | 3.316   |
| .GS12 | (.27.) | 3.943    | 0.022   | 175.546 | 0.000   | 3.943  | 4.130   |

Variances:

|       |  | Estimate | Std.Err | z-value | P(> z ) | Std.lv | Std.all |
|-------|--|----------|---------|---------|---------|--------|---------|
| f1    |  | 0.975    | 0.136   | 7.154   | 0.000   | 1.000  | 1.000   |
| .GS2  |  | 0.911    | 0.110   | 8.311   | 0.000   | 0.911  | 0.662   |
| .GS5  |  | 0.976    | 0.124   | 7.887   | 0.000   | 0.976  | 0.574   |
| .GS7  |  | 0.702    | 0.094   | 7.466   | 0.000   | 0.702  | 0.502   |
| .GS8  |  | 0.714    | 0.102   | 6.976   | 0.000   | 0.714  | 0.430   |
| .GS4  |  | 1.255    | 0.140   | 8.984   | 0.000   | 1.255  | 0.901   |
| .GS6  |  | 0.846    | 0.096   | 8.793   | 0.000   | 0.846  | 0.843   |
| .GS9  |  | 0.655    | 0.083   | 7.874   | 0.000   | 0.655  | 0.572   |
| .GS12 |  | 0.686    | 0.080   | 8.575   | 0.000   | 0.686  | 0.752   |

Group 3 [3]:

Latent Variables:

|     |        | Estimate | Std.Err | z-value | P(> z ) | Std.lv | Std.all |
|-----|--------|----------|---------|---------|---------|--------|---------|
| f1  | =~     |          |         |         |         |        |         |
| GS2 | (.p1.) | 0.690    | 0.026   | 26.953  | 0.000   | 0.664  | 0.567   |
| GS5 | (.p2.) | 0.862    | 0.029   | 29.996  | 0.000   | 0.829  | 0.635   |
| GS7 | (.p3.) | 0.846    | 0.027   | 31.917  | 0.000   | 0.813  | 0.673   |
| GS8 | (.p4.) | 0.985    | 0.029   | 34.106  | 0.000   | 0.947  | 0.755   |
| GS4 | (.p5.) | 0.377    | 0.028   | 13.378  | 0.000   | 0.362  | 0.284   |
| GS6 | (.p6.) | 0.401    | 0.021   | 19.096  | 0.000   | 0.386  | 0.494   |
| GS9 | (.p7.) | 0.709    | 0.024   | 29.454  | 0.000   | 0.682  | 0.675   |

PSYCHOMETRIC EVALUATION OF THE GRIT-S

GS12 (.p8.) 0.481 0.022 21.603 0.000 0.463 0.488

Covariances:

|         | Estimate | Std.Err | z-value | P(> z ) | Std.lv | Std.all |
|---------|----------|---------|---------|---------|--------|---------|
| .GS6 ~~ |          |         |         |         |        |         |
| .GS12   | 0.045    | 0.048   | 0.938   | 0.348   | 0.045  | 0.081   |

Intercepts:

|              | Estimate | Std.Err | z-value | P(> z ) | Std.lv | Std.all |
|--------------|----------|---------|---------|---------|--------|---------|
| f1           | 0.336    | 0.090   | 3.736   | 0.000   | 0.349  | 0.349   |
| .GS2 (.20.)  | 2.453    | 0.027   | 90.329  | 0.000   | 2.453  | 2.097   |
| .GS5 (.21.)  | 2.812    | 0.031   | 90.243  | 0.000   | 2.812  | 2.154   |
| .GS7 (.22.)  | 3.055    | 0.029   | 104.647 | 0.000   | 3.055  | 2.527   |
| .GS8 (.23.)  | 2.961    | 0.033   | 90.719  | 0.000   | 2.961  | 2.362   |
| .GS4         | 3.198    | 0.099   | 32.187  | 0.000   | 3.198  | 2.513   |
| .GS6 (.25.)  | 4.327    | 0.021   | 207.692 | 0.000   | 4.327  | 5.539   |
| .GS9 (.26.)  | 3.548    | 0.026   | 136.578 | 0.000   | 3.548  | 3.514   |
| .GS12 (.27.) | 3.943    | 0.022   | 175.546 | 0.000   | 3.943  | 4.159   |

Variances:

|       | Estimate | Std.Err | z-value | P(> z ) | Std.lv | Std.all |
|-------|----------|---------|---------|---------|--------|---------|
| f1    | 0.924    | 0.133   | 6.946   | 0.000   | 1.000  | 1.000   |
| .GS2  | 0.928    | 0.115   | 8.062   | 0.000   | 0.928  | 0.678   |
| .GS5  | 1.018    | 0.132   | 7.743   | 0.000   | 1.018  | 0.597   |
| .GS7  | 0.801    | 0.107   | 7.499   | 0.000   | 0.801  | 0.548   |
| .GS8  | 0.675    | 0.101   | 6.695   | 0.000   | 0.675  | 0.430   |
| .GS4  | 1.489    | 0.171   | 8.723   | 0.000   | 1.489  | 0.919   |
| .GS6  | 0.462    | 0.056   | 8.253   | 0.000   | 0.462  | 0.756   |
| .GS9  | 0.555    | 0.074   | 7.483   | 0.000   | 0.555  | 0.544   |
| .GS12 | 0.685    | 0.082   | 8.339   | 0.000   | 0.685  | 0.762   |

Group 4 [5]:

Latent Variables:

|             | Estimate | Std.Err | z-value | P(> z ) | Std.lv | Std.all |
|-------------|----------|---------|---------|---------|--------|---------|
| f1 =~       |          |         |         |         |        |         |
| GS2 (.p1.)  | 0.690    | 0.026   | 26.953  | 0.000   | 0.712  | 0.589   |
| GS5 (.p2.)  | 0.862    | 0.029   | 29.996  | 0.000   | 0.890  | 0.679   |
| GS7 (.p3.)  | 0.846    | 0.027   | 31.917  | 0.000   | 0.873  | 0.670   |
| GS8 (.p4.)  | 0.985    | 0.029   | 34.106  | 0.000   | 1.016  | 0.795   |
| GS4 (.p5.)  | 0.377    | 0.028   | 13.378  | 0.000   | 0.389  | 0.325   |
| GS6 (.p6.)  | 0.401    | 0.021   | 19.096  | 0.000   | 0.414  | 0.415   |
| GS9 (.p7.)  | 0.709    | 0.024   | 29.454  | 0.000   | 0.732  | 0.658   |
| GS12 (.p8.) | 0.481    | 0.022   | 21.603  | 0.000   | 0.497  | 0.511   |

## PSYCHOMETRIC EVALUATION OF THE GRIT-S

### Covariances:

|         | Estimate | Std.Err | z-value | P(> z ) | Std.lv | Std.all |
|---------|----------|---------|---------|---------|--------|---------|
| .GS6 ~~ |          |         |         |         |        |         |
| .GS12   | 0.242    | 0.052   | 4.641   | 0.000   | 0.242  | 0.319   |

### Intercepts:

|              | Estimate | Std.Err | z-value | P(> z ) | Std.lv | Std.all |
|--------------|----------|---------|---------|---------|--------|---------|
| f1           | 0.029    | 0.075   | 0.392   | 0.695   | 0.029  | 0.029   |
| .GS2 (.20.)  | 2.453    | 0.027   | 90.329  | 0.000   | 2.453  | 2.028   |
| .GS5 (.21.)  | 2.812    | 0.031   | 90.243  | 0.000   | 2.812  | 2.145   |
| .GS7 (.22.)  | 3.055    | 0.029   | 104.647 | 0.000   | 3.055  | 2.347   |
| .GS8 (.23.)  | 2.961    | 0.033   | 90.719  | 0.000   | 2.961  | 2.316   |
| .GS4         | 3.249    | 0.071   | 45.660  | 0.000   | 3.249  | 2.716   |
| .GS6 (.25.)  | 4.327    | 0.021   | 207.692 | 0.000   | 4.327  | 4.340   |
| .GS9 (.26.)  | 3.548    | 0.026   | 136.578 | 0.000   | 3.548  | 3.193   |
| .GS12 (.27.) | 3.943    | 0.022   | 175.546 | 0.000   | 3.943  | 4.060   |

### Variances:

|       | Estimate | Std.Err | z-value | P(> z ) | Std.lv | Std.all |
|-------|----------|---------|---------|---------|--------|---------|
| f1    | 1.065    | 0.121   | 8.808   | 0.000   | 1.000  | 1.000   |
| .GS2  | 0.954    | 0.091   | 10.503  | 0.000   | 0.954  | 0.653   |
| .GS5  | 0.927    | 0.094   | 9.825   | 0.000   | 0.927  | 0.539   |
| .GS7  | 0.933    | 0.094   | 9.928   | 0.000   | 0.933  | 0.551   |
| .GS8  | 0.602    | 0.075   | 8.042   | 0.000   | 0.602  | 0.368   |
| .GS4  | 1.281    | 0.114   | 11.239  | 0.000   | 1.281  | 0.895   |
| .GS6  | 0.823    | 0.074   | 11.059  | 0.000   | 0.823  | 0.828   |
| .GS9  | 0.700    | 0.070   | 9.933   | 0.000   | 0.700  | 0.567   |
| .GS12 | 0.697    | 0.065   | 10.779  | 0.000   | 0.697  | 0.739   |

# PSYCHOMETRIC EVALUATION OF THE GRIT-S

#IRT item parameters

n5=mirt(gr3,1)

Iteration: 25, Log-Lik: -21285.496, Max-Change: 0.00008

coef(n5,IRTpars=TRUE)

\$GS2

|     | a     | b1     | b2     | b3    | b4    |
|-----|-------|--------|--------|-------|-------|
| par | 1.448 | -1.037 | -0.038 | 1.325 | 2.956 |

\$GS5

|     | a     | b1     | b2     | b3    | b4    |
|-----|-------|--------|--------|-------|-------|
| par | 1.741 | -1.188 | -0.376 | 0.592 | 1.791 |

\$GS7

|     | a     | b1     | b2     | b3    | b4    |
|-----|-------|--------|--------|-------|-------|
| par | 1.937 | -1.578 | -0.655 | 0.284 | 1.706 |

\$GS8

|     | a     | b1     | b2     | b3    | b4    |
|-----|-------|--------|--------|-------|-------|
| par | 2.315 | -1.158 | -0.481 | 0.299 | 1.438 |

\$GS4

|     | a     | b1     | b2     | b3    | b4    |
|-----|-------|--------|--------|-------|-------|
| par | 0.684 | -4.075 | -1.361 | 0.573 | 2.556 |

\$GS6

|     | a     | b1     | b2     | b3     | b4     |
|-----|-------|--------|--------|--------|--------|
| par | 1.219 | -4.461 | -2.986 | -1.582 | -0.253 |

\$GS9

|     | a     | b1     | b2     | b3     | b4    |
|-----|-------|--------|--------|--------|-------|
| par | 1.867 | -2.744 | -1.318 | -0.125 | 1.032 |

\$GS12

|     | a     | b1     | b2    | b3     | b4    |
|-----|-------|--------|-------|--------|-------|
| par | 1.279 | -4.304 | -2.59 | -0.735 | 0.632 |

\$GroupPars

|     | MEAN_1 | COV_11 |
|-----|--------|--------|
| par | 0      | 1      |

## PSYCHOMETRIC EVALUATION OF THE GRIT-S

#####

Sample 2

#####

```
ont2=read.csv('data2.csv',header=TRUE)
```

```
#Parallel analysis plot
```

```
l1=fa.parallel(ont2)
```

```
plot(l1$pc.values,type='b',ylab='eigenvalue',main='Parallel Analysis Scree Plot - Study 2')
```

```
abline(h=1)
```

```
lines(l1$pc.sim,type='b',col='gray')
```

```
#see Figure A
```

```
##Bifactor model for Factor Strength
```

```
m3='
```

```
f1=~GS1+GS3+GS5+GS6+GS2+GS4+GS7+GS8
```

```
g1=~GS1+GS3+GS5+GS6
```

```
g2=~GS2+GS4+GS7+GS8
```

```
'
```

```
fitm3=cfa(m3,data=ont2,std.lv=T,orthogonal=T)
```

```
summary(fitm3,fit.measures=T,standardized=T)
```

lavaan 0.6-3 ended normally after 33 iterations

|                           |        |
|---------------------------|--------|
| Optimization method       | NLMINB |
| Number of free parameters | 24     |

|                        |     |
|------------------------|-----|
| Number of observations | 522 |
|------------------------|-----|

|                          |        |
|--------------------------|--------|
| Estimator                | ML     |
| Model Fit Test Statistic | 11.356 |
| Degrees of freedom       | 12     |
| P-value (Chi-square)     | 0.499  |

Model test baseline model:

|                                 |          |
|---------------------------------|----------|
| Minimum Function Test Statistic | 2411.252 |
| Degrees of freedom              | 28       |
| P-value                         | 0.000    |

PSYCHOMETRIC EVALUATION OF THE GRIT-S

User model versus baseline model:

|                             |       |
|-----------------------------|-------|
| Comparative Fit Index (CFI) | 1.000 |
| Tucker-Lewis Index (TLI)    | 1.001 |

Loglikelihood and Information Criteria:

|                                       |           |
|---------------------------------------|-----------|
| Loglikelihood user model (H0)         | -4966.132 |
| Loglikelihood unrestricted model (H1) | -4960.454 |
| Number of free parameters             | 24        |
| Akaike (AIC)                          | 9980.263  |
| Bayesian (BIC)                        | 10082.447 |
| Sample-size adjusted Bayesian (BIC)   | 10006.266 |

Root Mean Square Error of Approximation:

|                                |             |
|--------------------------------|-------------|
| RMSEA                          | 0.000       |
| 90 Percent Confidence Interval | 0.000 0.043 |
| P-value RMSEA <= 0.05          | 0.982       |

Standardized Root Mean Square Residual:

|      |       |
|------|-------|
| SRMR | 0.012 |
|------|-------|

Parameter Estimates:

|                                  |            |
|----------------------------------|------------|
| Information                      | Expected   |
| Information saturated (h1) model | Structured |
| Standard Errors                  | Standard   |

Latent Variables:

|       | Estimate | Std.Err | z-value | P(> z ) | Std.lv | Std.all |
|-------|----------|---------|---------|---------|--------|---------|
| f1 =~ |          |         |         |         |        |         |
| GS1   | 0.814    | 0.054   | 15.024  | 0.000   | 0.814  | 0.729   |
| GS3   | 0.843    | 0.059   | 14.197  | 0.000   | 0.843  | 0.716   |
| GS5   | 0.840    | 0.048   | 17.414  | 0.000   | 0.840  | 0.789   |
| GS6   | 1.024    | 0.056   | 18.430  | 0.000   | 1.024  | 0.816   |
| GS2   | 0.696    | 0.055   | 12.568  | 0.000   | 0.696  | 0.573   |
| GS4   | 0.418    | 0.040   | 10.574  | 0.000   | 0.418  | 0.509   |
| GS7   | 0.823    | 0.047   | 17.337  | 0.000   | 0.823  | 0.783   |
| GS8   | 0.520    | 0.041   | 12.724  | 0.000   | 0.520  | 0.603   |
| g1 =~ |          |         |         |         |        |         |
| GS1   | 0.363    | 0.101   | 3.577   | 0.000   | 0.363  | 0.325   |
| GS3   | 0.657    | 0.093   | 7.023   | 0.000   | 0.657  | 0.558   |



PSYCHOMETRIC EVALUATION OF THE GRIT-S

|       |       |       |        |       |       |       |
|-------|-------|-------|--------|-------|-------|-------|
| GS5   | 0.281 | 0.090 | 3.119  | 0.002 | 0.281 | 0.264 |
| GS6   | 0.162 | 0.107 | 1.509  | 0.131 | 0.162 | 0.129 |
| g2 =~ |       |       |        |       |       |       |
| GS2   | 0.244 | 0.066 | 3.724  | 0.000 | 0.244 | 0.201 |
| GS4   | 0.438 | 0.048 | 9.212  | 0.000 | 0.438 | 0.534 |
| GS7   | 0.300 | 0.057 | 5.267  | 0.000 | 0.300 | 0.286 |
| GS8   | 0.583 | 0.048 | 12.198 | 0.000 | 0.583 | 0.677 |

Covariances:

|       | Estimate | Std.Err | z-value | P(> z ) | Std.lv | Std.all |
|-------|----------|---------|---------|---------|--------|---------|
| f1 ~~ |          |         |         |         |        |         |
| g1    | 0.000    |         | 0.000   | 0.000   | 0.000  |         |
| g2    | 0.000    |         | 0.000   | 0.000   | 0.000  |         |
| g1 ~~ |          |         |         |         |        |         |
| g2    | 0.000    |         | 0.000   | 0.000   | 0.000  |         |

Variances:

|      | Estimate | Std.Err | z-value | P(> z ) | Std.lv | Std.all |
|------|----------|---------|---------|---------|--------|---------|
| .GS1 | 0.453    | 0.039   | 11.656  | 0.000   | 0.453  | 0.363   |
| .GS3 | 0.244    | 0.117   | 2.084   | 0.037   | 0.244  | 0.176   |
| .GS5 | 0.349    | 0.028   | 12.423  | 0.000   | 0.349  | 0.308   |
| .GS6 | 0.500    | 0.050   | 9.925   | 0.000   | 0.500  | 0.318   |
| .GS2 | 0.931    | 0.062   | 15.087  | 0.000   | 0.931  | 0.631   |
| .GS4 | 0.307    | 0.031   | 10.028  | 0.000   | 0.307  | 0.456   |
| .GS7 | 0.336    | 0.031   | 10.733  | 0.000   | 0.336  | 0.304   |
| .GS8 | 0.132    | 0.044   | 3.025   | 0.002   | 0.132  | 0.178   |
| f1   | 1.000    |         | 1.000   | 1.000   | 1.000  |         |
| g1   | 1.000    |         | 1.000   | 1.000   | 1.000  |         |
| g2   | 1.000    |         | 1.000   | 1.000   | 1.000  |         |

## Unidimensional Model

```

m1='
f1=~GS1+GS2+GS3+GS4+GS5+GS6+GS7+GS8
'
fitm1=cfa(m1,data=ont2,std.lv=T)
summary(fitm1,fit.measures=T,standardized=T)

```

lavaan 0.6-3 ended normally after 17 iterations

## PSYCHOMETRIC EVALUATION OF THE GRIT-S

|                           |         |
|---------------------------|---------|
| Optimization method       | NLMINB  |
| Number of free parameters | 16      |
| Number of observations    | 522     |
| Estimator                 | ML      |
| Model Fit Test Statistic  | 329.675 |
| Degrees of freedom        | 20      |
| P-value (Chi-square)      | 0.000   |

### Model test baseline model:

|                                 |          |
|---------------------------------|----------|
| Minimum Function Test Statistic | 2411.252 |
| Degrees of freedom              | 28       |
| P-value                         | 0.000    |

### User model versus baseline model:

|                             |       |
|-----------------------------|-------|
| Comparative Fit Index (CFI) | 0.870 |
| Tucker-Lewis Index (TLI)    | 0.818 |

### Loglikelihood and Information Criteria:

|                                       |           |
|---------------------------------------|-----------|
| Loglikelihood user model (H0)         | -5125.291 |
| Loglikelihood unrestricted model (H1) | -4960.454 |
| Number of free parameters             | 16        |
| Akaike (AIC)                          | 10282.583 |
| Bayesian (BIC)                        | 10350.705 |
| Sample-size adjusted Bayesian (BIC)   | 10299.918 |

### Root Mean Square Error of Approximation:

|                                |             |
|--------------------------------|-------------|
| RMSEA                          | 0.172       |
| 90 Percent Confidence Interval | 0.156 0.189 |
| P-value RMSEA <= 0.05          | 0.000       |

### Standardized Root Mean Square Residual:

|      |       |
|------|-------|
| SRMR | 0.077 |
|------|-------|

### Parameter Estimates:

|                                  |            |
|----------------------------------|------------|
| Information                      | Expected   |
| Information saturated (h1) model | Structured |

PSYCHOMETRIC EVALUATION OF THE GRIT-S

Standard Errors                      Standard

Latent Variables:

|       | Estimate | Std.Err | z-value | P(> z ) | Std.lv | Std.all |
|-------|----------|---------|---------|---------|--------|---------|
| f1 =~ |          |         |         |         |        |         |
| GS1   | 0.864    | 0.042   | 20.395  | 0.000   | 0.864  | 0.773   |
| GS2   | 0.710    | 0.050   | 14.098  | 0.000   | 0.710  | 0.584   |
| GS3   | 0.926    | 0.044   | 20.932  | 0.000   | 0.926  | 0.787   |
| GS4   | 0.464    | 0.034   | 13.553  | 0.000   | 0.464  | 0.566   |
| GS5   | 0.872    | 0.039   | 22.208  | 0.000   | 0.872  | 0.819   |
| GS6   | 1.018    | 0.046   | 21.914  | 0.000   | 1.018  | 0.811   |
| GS7   | 0.834    | 0.039   | 21.205  | 0.000   | 0.834  | 0.794   |
| GS8   | 0.570    | 0.035   | 16.479  | 0.000   | 0.570  | 0.662   |

Variances:

|      | Estimate | Std.Err | z-value | P(> z ) | Std.lv | Std.all |
|------|----------|---------|---------|---------|--------|---------|
| .GS1 | 0.502    | 0.036   | 13.849  | 0.000   | 0.502  | 0.402   |
| .GS2 | 0.971    | 0.063   | 15.357  | 0.000   | 0.971  | 0.658   |
| .GS3 | 0.527    | 0.039   | 13.627  | 0.000   | 0.527  | 0.381   |
| .GS4 | 0.458    | 0.030   | 15.431  | 0.000   | 0.458  | 0.680   |
| .GS5 | 0.374    | 0.029   | 12.990  | 0.000   | 0.374  | 0.330   |
| .GS6 | 0.538    | 0.041   | 13.153  | 0.000   | 0.538  | 0.342   |
| .GS7 | 0.408    | 0.030   | 13.505  | 0.000   | 0.408  | 0.370   |
| .GS8 | 0.417    | 0.028   | 14.954  | 0.000   | 0.417  | 0.562   |
| f1   | 1.000    |         |         | 1.000   | 1.000  |         |

## Unidimensional Model with correlated residual

```

m2='
f1=~GS1+GS2+GS3+GS4+GS5+GS6+GS7+GS8
GS4~~GS8
'

fitm2=cfa(m2,data=ont2,std.lv=T)
summary(fitm2,fit.measures=T,standardized=T)
    
```

## PSYCHOMETRIC EVALUATION OF THE GRIT-S

lavaan 0.6-3 ended normally after 20 iterations

|                           |         |
|---------------------------|---------|
| Optimization method       | NLMINB  |
| Number of free parameters | 17      |
| Number of observations    | 522     |
| Estimator                 | ML      |
| Model Fit Test Statistic  | 181.997 |
| Degrees of freedom        | 19      |
| P-value (Chi-square)      | 0.000   |

Model test baseline model:

|                                 |          |
|---------------------------------|----------|
| Minimum Function Test Statistic | 2411.252 |
| Degrees of freedom              | 28       |
| P-value                         | 0.000    |

User model versus baseline model:

|                             |       |
|-----------------------------|-------|
| Comparative Fit Index (CFI) | 0.932 |
| Tucker-Lewis Index (TLI)    | 0.899 |

Loglikelihood and Information Criteria:

|                                       |           |
|---------------------------------------|-----------|
| Loglikelihood user model (H0)         | -5051.452 |
| Loglikelihood unrestricted model (H1) | -4960.454 |
| Number of free parameters             | 17        |
| Akaike (AIC)                          | 10136.905 |
| Bayesian (BIC)                        | 10209.285 |
| Sample-size adjusted Bayesian (BIC)   | 10155.323 |

Root Mean Square Error of Approximation:

|                                |             |
|--------------------------------|-------------|
| RMSEA                          | 0.128       |
| 90 Percent Confidence Interval | 0.112 0.146 |
| P-value RMSEA $\leq$ 0.05      | 0.000       |

Standardized Root Mean Square Residual:

|      |       |
|------|-------|
| SRMR | 0.061 |
|------|-------|

Parameter Estimates:

PSYCHOMETRIC EVALUATION OF THE GRIT-S

Information                      Expected  
 Information saturated (h1) model      Structured  
 Standard Errors                      Standard

Latent Variables:

|       | Estimate | Std.Err | z-value | P(> z ) | Std.lv | Std.all |
|-------|----------|---------|---------|---------|--------|---------|
| f1 =~ |          |         |         |         |        |         |
| GS1   | 0.879    | 0.042   | 20.913  | 0.000   | 0.879  | 0.787   |
| GS2   | 0.694    | 0.051   | 13.697  | 0.000   | 0.694  | 0.571   |
| GS3   | 0.948    | 0.044   | 21.632  | 0.000   | 0.948  | 0.805   |
| GS4   | 0.426    | 0.035   | 12.197  | 0.000   | 0.426  | 0.518   |
| GS5   | 0.885    | 0.039   | 22.694  | 0.000   | 0.885  | 0.831   |
| GS6   | 1.022    | 0.046   | 22.022  | 0.000   | 1.022  | 0.815   |
| GS7   | 0.815    | 0.040   | 20.470  | 0.000   | 0.815  | 0.776   |
| GS8   | 0.537    | 0.035   | 15.260  | 0.000   | 0.537  | 0.624   |

Covariances:

|         | Estimate | Std.Err | z-value | P(> z ) | Std.lv | Std.all |
|---------|----------|---------|---------|---------|--------|---------|
| .GS4 ~~ |          |         |         |         |        |         |
| .GS8    | 0.244    | 0.025   | 9.854   | 0.000   | 0.244  | 0.515   |

Variances:

|      | Estimate | Std.Err | z-value | P(> z ) | Std.lv | Std.all |
|------|----------|---------|---------|---------|--------|---------|
| .GS1 | 0.475    | 0.035   | 13.573  | 0.000   | 0.475  | 0.381   |
| .GS2 | 0.994    | 0.065   | 15.396  | 0.000   | 0.994  | 0.674   |
| .GS3 | 0.488    | 0.037   | 13.226  | 0.000   | 0.488  | 0.352   |
| .GS4 | 0.493    | 0.032   | 15.561  | 0.000   | 0.493  | 0.731   |
| .GS5 | 0.351    | 0.028   | 12.604  | 0.000   | 0.351  | 0.310   |
| .GS6 | 0.530    | 0.041   | 13.015  | 0.000   | 0.530  | 0.336   |
| .GS7 | 0.440    | 0.032   | 13.762  | 0.000   | 0.440  | 0.399   |
| .GS8 | 0.454    | 0.030   | 15.151  | 0.000   | 0.454  | 0.611   |
| f1   | 1.000    |         |         |         | 1.000  | 1.000   |

### Two factor congeneric model

m4='

g1=~GS1+GS3+GS5+GS6

g2=~GS2+GS4+GS7+GS8

'

fitm4=cfa(m4,data=ont2,std.lv=T)

summary(fitm4,fit.measures=T,standardized=T)

## PSYCHOMETRIC EVALUATION OF THE GRIT-S

lavaan 0.6-3 ended normally after 21 iterations

|                           |         |
|---------------------------|---------|
| Optimization method       | NLMINB  |
| Number of free parameters | 17      |
| Number of observations    | 522     |
| Estimator                 | ML      |
| Model Fit Test Statistic  | 124.674 |
| Degrees of freedom        | 19      |
| P-value (Chi-square)      | 0.000   |

Model test baseline model:

|                                 |          |
|---------------------------------|----------|
| Minimum Function Test Statistic | 2411.252 |
| Degrees of freedom              | 28       |
| P-value                         | 0.000    |

User model versus baseline model:

|                             |       |
|-----------------------------|-------|
| Comparative Fit Index (CFI) | 0.956 |
| Tucker-Lewis Index (TLI)    | 0.935 |

Loglikelihood and Information Criteria:

|                                       |           |
|---------------------------------------|-----------|
| Loglikelihood user model (H0)         | -5022.791 |
| Loglikelihood unrestricted model (H1) | -4960.454 |
| Number of free parameters             | 17        |
| Akaike (AIC)                          | 10079.581 |
| Bayesian (BIC)                        | 10151.962 |
| Sample-size adjusted Bayesian (BIC)   | 10098.000 |

Root Mean Square Error of Approximation:

|                                |             |
|--------------------------------|-------------|
| RMSEA                          | 0.103       |
| 90 Percent Confidence Interval | 0.086 0.121 |
| P-value RMSEA <= 0.05          | 0.000       |

Standardized Root Mean Square Residual:

|      |       |
|------|-------|
| SRMR | 0.050 |
|------|-------|

PSYCHOMETRIC EVALUATION OF THE GRIT-S

Parameter Estimates:

Information                      Expected  
 Information saturated (h1) model      Structured  
 Standard Errors                      Standard

Latent Variables:

|       | Estimate | Std.Err | z-value | P(> z ) | Std.lv | Std.all |
|-------|----------|---------|---------|---------|--------|---------|
| g1 =~ |          |         |         |         |        |         |
| GS1   | 0.894    | 0.042   | 21.347  | 0.000   | 0.894  | 0.800   |
| GS3   | 0.979    | 0.043   | 22.612  | 0.000   | 0.979  | 0.832   |
| GS5   | 0.899    | 0.039   | 23.155  | 0.000   | 0.899  | 0.845   |
| GS6   | 1.015    | 0.047   | 21.672  | 0.000   | 1.015  | 0.809   |
| g2 =~ |          |         |         |         |        |         |
| GS2   | 0.743    | 0.051   | 14.602  | 0.000   | 0.743  | 0.612   |
| GS4   | 0.567    | 0.033   | 17.062  | 0.000   | 0.567  | 0.691   |
| GS7   | 0.894    | 0.039   | 22.808  | 0.000   | 0.894  | 0.851   |
| GS8   | 0.688    | 0.033   | 20.830  | 0.000   | 0.688  | 0.799   |

Covariances:

|       | Estimate | Std.Err | z-value | P(> z ) | Std.lv | Std.all |
|-------|----------|---------|---------|---------|--------|---------|
| g1 ~~ |          |         |         |         |        |         |
| g2    | 0.778    | 0.024   | 31.974  | 0.000   | 0.778  | 0.778   |

Variances:

|      | Estimate | Std.Err | z-value | P(> z ) | Std.lv | Std.all |
|------|----------|---------|---------|---------|--------|---------|
| .GS1 | 0.449    | 0.034   | 13.027  | 0.000   | 0.449  | 0.359   |
| .GS3 | 0.427    | 0.035   | 12.200  | 0.000   | 0.427  | 0.308   |
| .GS5 | 0.325    | 0.028   | 11.764  | 0.000   | 0.325  | 0.287   |
| .GS6 | 0.545    | 0.042   | 12.837  | 0.000   | 0.545  | 0.346   |
| .GS2 | 0.923    | 0.063   | 14.764  | 0.000   | 0.923  | 0.626   |
| .GS4 | 0.352    | 0.025   | 14.007  | 0.000   | 0.352  | 0.523   |
| .GS7 | 0.305    | 0.031   | 9.879   | 0.000   | 0.305  | 0.276   |
| .GS8 | 0.268    | 0.023   | 11.871  | 0.000   | 0.268  | 0.362   |
| g1   | 1.000    |         |         |         | 1.000  | 1.000   |
| g2   | 1.000    |         |         |         | 1.000  | 1.000   |

## Two factor noncongeneric model

fa(ont2,2)

Factor Analysis using method = minres

## PSYCHOMETRIC EVALUATION OF THE GRIT-S

Call: fa(r = ont2, n factors = 2)

Standardized loadings (pattern matrix) based upon correlation matrix

|     | MR1   | MR2   | h2   | u2   | com |
|-----|-------|-------|------|------|-----|
| GS1 | 0.82  | -0.01 | 0.65 | 0.35 | 1.0 |
| GS2 | 0.28  | 0.40  | 0.37 | 0.63 | 1.8 |
| GS3 | 0.91  | -0.09 | 0.73 | 0.27 | 1.0 |
| GS4 | -0.05 | 0.79  | 0.58 | 0.42 | 1.0 |
| GS5 | 0.80  | 0.05  | 0.70 | 0.30 | 1.0 |
| GS6 | 0.69  | 0.17  | 0.65 | 0.35 | 1.1 |
| GS7 | 0.41  | 0.50  | 0.67 | 0.33 | 1.9 |
| GS8 | 0.00  | 0.87  | 0.76 | 0.24 | 1.0 |

|                       | MR1  | MR2  |
|-----------------------|------|------|
| SS loadings           | 3.07 | 2.04 |
| Proportion Var        | 0.38 | 0.26 |
| Cumulative Var        | 0.38 | 0.64 |
| Proportion Explained  | 0.60 | 0.40 |
| Cumulative Proportion | 0.60 | 1.00 |

With factor correlations of

|     | MR1  | MR2  |
|-----|------|------|
| MR1 | 1.00 | 0.62 |
| MR2 | 0.62 | 1.00 |

Mean item complexity = 1.2

Test of the hypothesis that 2 factors are sufficient.

The degrees of freedom for the null model are 28 and the objective function was 4.62 with Chi Square of 2390.47

The degrees of freedom for the model are 13 and the objective function was 0.03

The root mean square of the residuals (RMSR) is 0.01

The df corrected root mean square of the residuals is 0.02

The harmonic number of observations is 522 with the empirical chi square 4.78 with prob < 0.98

The total number of observations was 522 with Likelihood Chi Square = 17.9 with prob < 0.16

Tucker Lewis Index of factoring reliability = 0.996

RMSEA index = 0.027 and the 90 % confidence intervals are 0 0.055

BIC = -63.45

Fit based upon off diagonal values = 1

Measures of factor score adequacy

|                                                 | MR1  | MR2  |
|-------------------------------------------------|------|------|
| Correlation of (regression) scores with factors | 0.95 | 0.93 |
| Multiple R square of scores with factors        | 0.91 | 0.86 |



## PSYCHOMETRIC EVALUATION OF THE GRIT-S

Minimum correlation of possible factor scores 0.81 0.73

##Partial Invariance Model for Gender

```
o3<-cfa(metric,data=ont41,group="sex1",  
group.equal=c("loadings","intercepts"),group.partial =  
c("f1=~GS8","f1=~GS4","GS8~1","GS4~1"),missing='ml')  
summary(o3,fit.measures=T)
```

lavaan 0.6-3 ended normally after 51 iterations

|                                |        |
|--------------------------------|--------|
| Optimization method            | NLMINB |
| Number of free parameters      | 52     |
| Number of equality constraints | 12     |

|                                      |     |
|--------------------------------------|-----|
| Number of observations per group     |     |
| 1                                    | 262 |
| 0                                    | 260 |
| Number of missing patterns per group |     |
| 1                                    | 1   |
| 0                                    | 1   |

|                          |         |
|--------------------------|---------|
| Estimator                | ML      |
| Model Fit Test Statistic | 217.500 |
| Degrees of freedom       | 48      |
| P-value (Chi-square)     | 0.000   |

Chi-square for each group:

|   |         |
|---|---------|
| 1 | 108.764 |
| 0 | 108.736 |

Model test baseline model:

|                                 |          |
|---------------------------------|----------|
| Minimum Function Test Statistic | 2454.407 |
| Degrees of freedom              | 56       |
| P-value                         | 0.000    |

User model versus baseline model:

|                             |       |
|-----------------------------|-------|
| Comparative Fit Index (CFI) | 0.929 |
| Tucker-Lewis Index (TLI)    | 0.918 |

# PSYCHOMETRIC EVALUATION OF THE GRIT-S

## Loglikelihood and Information Criteria:

|                                       |           |
|---------------------------------------|-----------|
| Loglikelihood user model (H0)         | -5024.167 |
| Loglikelihood unrestricted model (H1) | -4915.417 |
| Number of free parameters             | 40        |
| Akaike (AIC)                          | 10128.334 |
| Bayesian (BIC)                        | 10298.641 |
| Sample-size adjusted Bayesian (BIC)   | 10171.672 |

## Root Mean Square Error of Approximation:

|                                |             |
|--------------------------------|-------------|
| RMSEA                          | 0.116       |
| 90 Percent Confidence Interval | 0.101 0.132 |
| P-value RMSEA $\leq$ 0.05      | 0.000       |

## Standardized Root Mean Square Residual:

|      |       |
|------|-------|
| SRMR | 0.067 |
|------|-------|

## Parameter Estimates:

|                               |          |
|-------------------------------|----------|
| Information                   | Observed |
| Observed information based on | Hessian  |
| Standard Errors               | Standard |

## Group 1 [1]:

### Latent Variables:

|            | Estimate | Std.Err | z-value | P(> z ) |
|------------|----------|---------|---------|---------|
| f1 =~      |          |         |         |         |
| GS1 (.p1.) | 0.898    | 0.053   | 16.939  | 0.000   |
| GS2 (.p2.) | 0.729    | 0.058   | 12.587  | 0.000   |
| GS3 (.p3.) | 0.966    | 0.056   | 17.242  | 0.000   |
| GS4        | 0.350    | 0.044   | 7.925   | 0.000   |
| GS5 (.p5.) | 0.904    | 0.050   | 18.006  | 0.000   |
| GS6 (.p6.) | 1.046    | 0.059   | 17.584  | 0.000   |
| GS7 (.p7.) | 0.835    | 0.049   | 16.881  | 0.000   |
| GS8        | 0.456    | 0.047   | 9.700   | 0.000   |

### Covariances:

|         | Estimate | Std.Err | z-value | P(> z ) |
|---------|----------|---------|---------|---------|
| .GS4 ~~ |          |         |         |         |

PSYCHOMETRIC EVALUATION OF THE GRIT-S

.GS8            0.193   0.030   6.459   0.000

Intercepts:

|      | Estimate     | Std.Err | z-value | P(> z ) |
|------|--------------|---------|---------|---------|
| f1   | 0.000        |         |         |         |
| .GS1 | (.20.) 3.053 | 0.064   | 47.338  | 0.000   |
| .GS2 | (.21.) 3.055 | 0.064   | 48.095  | 0.000   |
| .GS3 | (.22.) 3.004 | 0.069   | 43.760  | 0.000   |
| .GS4 | 4.431        | 0.045   | 98.737  | 0.000   |
| .GS5 | (.24.) 3.282 | 0.063   | 52.272  | 0.000   |
| .GS6 | (.25.) 3.416 | 0.074   | 46.435  | 0.000   |
| .GS7 | (.26.) 3.697 | 0.060   | 61.416  | 0.000   |
| .GS8 | 4.130        | 0.049   | 84.084  | 0.000   |

Variances:

|      | Estimate | Std.Err | z-value | P(> z ) |
|------|----------|---------|---------|---------|
| f1   | 1.000    |         |         |         |
| .GS1 | 0.483    | 0.051   | 9.473   | 0.000   |
| .GS2 | 1.129    | 0.104   | 10.900  | 0.000   |
| .GS3 | 0.542    | 0.058   | 9.400   | 0.000   |
| .GS4 | 0.405    | 0.037   | 11.073  | 0.000   |
| .GS5 | 0.346    | 0.039   | 8.831   | 0.000   |
| .GS6 | 0.553    | 0.060   | 9.245   | 0.000   |
| .GS7 | 0.419    | 0.044   | 9.482   | 0.000   |
| .GS8 | 0.424    | 0.039   | 10.812  | 0.000   |

Group 2 [0]:

Latent Variables:

|            | Estimate | Std.Err | z-value | P(> z ) |
|------------|----------|---------|---------|---------|
| f1 =~      |          |         |         |         |
| GS1 (.p1.) | 0.898    | 0.053   | 16.939  | 0.000   |
| GS2 (.p2.) | 0.729    | 0.058   | 12.587  | 0.000   |
| GS3 (.p3.) | 0.966    | 0.056   | 17.242  | 0.000   |
| GS4        | 0.550    | 0.057   | 9.611   | 0.000   |
| GS5 (.p5.) | 0.904    | 0.050   | 18.006  | 0.000   |
| GS6 (.p6.) | 1.046    | 0.059   | 17.584  | 0.000   |
| GS7 (.p7.) | 0.835    | 0.049   | 16.881  | 0.000   |
| GS8        | 0.665    | 0.058   | 11.422  | 0.000   |

Covariances:

|         | Estimate | Std.Err | z-value | P(> z ) |
|---------|----------|---------|---------|---------|
| .GS4 ~~ |          |         |         |         |
| .GS8    | 0.244    | 0.037   | 6.631   | 0.000   |

## PSYCHOMETRIC EVALUATION OF THE GRIT-S

Intercepts:

|      | Estimate     | Std.Err | z-value | P(> z ) |
|------|--------------|---------|---------|---------|
| f1   | 0.110        | 0.090   | 1.218   | 0.223   |
| .GS1 | (.20.) 3.053 | 0.064   | 47.338  | 0.000   |
| .GS2 | (.21.) 3.055 | 0.064   | 48.095  | 0.000   |
| .GS3 | (.22.) 3.004 | 0.069   | 43.760  | 0.000   |
| .GS4 | 4.090        | 0.058   | 70.471  | 0.000   |
| .GS5 | (.24.) 3.282 | 0.063   | 52.272  | 0.000   |
| .GS6 | (.25.) 3.416 | 0.074   | 46.435  | 0.000   |
| .GS7 | (.26.) 3.697 | 0.060   | 61.416  | 0.000   |
| .GS8 | 3.935        | 0.061   | 64.104  | 0.000   |

Variances:

|      | Estimate | Std.Err | z-value | P(> z ) |
|------|----------|---------|---------|---------|
| f1   | 0.905    | 0.124   | 7.305   | 0.000   |
| .GS1 | 0.470    | 0.048   | 9.721   | 0.000   |
| .GS2 | 0.850    | 0.080   | 10.573  | 0.000   |
| .GS3 | 0.442    | 0.048   | 9.240   | 0.000   |
| .GS4 | 0.507    | 0.047   | 10.694  | 0.000   |
| .GS5 | 0.360    | 0.039   | 9.171   | 0.000   |
| .GS6 | 0.503    | 0.054   | 9.331   | 0.000   |
| .GS7 | 0.454    | 0.047   | 9.676   | 0.000   |
| .GS8 | 0.445    | 0.044   | 10.214  | 0.000   |

##Scalar Invariance model for Education

```
edu_o3<-cfa(metric,data=ont42,group="edu",  
group.equal=c("loadings","intercepts"),missing='ml')  
summary(edu_o3,fit.measures=T)
```

lavaan 0.6-3 ended normally after 52 iterations

|                                |        |
|--------------------------------|--------|
| Optimization method            | NLMINB |
| Number of free parameters      | 52     |
| Number of equality constraints | 16     |

|                                      |     |
|--------------------------------------|-----|
| Number of observations per group     |     |
| 2                                    | 290 |
| 3                                    | 192 |
| Number of missing patterns per group |     |
| 2                                    | 1   |
| 3                                    | 1   |

## PSYCHOMETRIC EVALUATION OF THE GRIT-S

|                          |         |
|--------------------------|---------|
| Estimator                | ML      |
| Model Fit Test Statistic | 203.153 |
| Degrees of freedom       | 52      |
| P-value (Chi-square)     | 0.000   |

Chi-square for each group:

|   |         |
|---|---------|
| 2 | 128.859 |
| 3 | 74.294  |

Model test baseline model:

|                                 |          |
|---------------------------------|----------|
| Minimum Function Test Statistic | 2308.351 |
| Degrees of freedom              | 56       |
| P-value                         | 0.000    |

User model versus baseline model:

|                             |       |
|-----------------------------|-------|
| Comparative Fit Index (CFI) | 0.933 |
| Tucker-Lewis Index (TLI)    | 0.928 |

Loglikelihood and Information Criteria:

|                                       |           |
|---------------------------------------|-----------|
| Loglikelihood user model (H0)         | -4664.876 |
| Loglikelihood unrestricted model (H1) | -4563.299 |
| Number of free parameters             | 36        |
| Akaike (AIC)                          | 9401.752  |
| Bayesian (BIC)                        | 9552.158  |
| Sample-size adjusted Bayesian (BIC)   | 9437.897  |

Root Mean Square Error of Approximation:

|                                |             |
|--------------------------------|-------------|
| RMSEA                          | 0.110       |
| 90 Percent Confidence Interval | 0.094 0.126 |
| P-value RMSEA $\leq$ 0.05      | 0.000       |

Standardized Root Mean Square Residual:

|      |       |
|------|-------|
| SRMR | 0.061 |
|------|-------|

Parameter Estimates:

|             |          |
|-------------|----------|
| Information | Observed |
|-------------|----------|

PSYCHOMETRIC EVALUATION OF THE GRIT-S

Observed information based on Hessian  
Standard Errors Standard

Group 1 [2]:

Latent Variables:

|            | Estimate | Std.Err | z-value | P(> z ) |
|------------|----------|---------|---------|---------|
| f1 =~      |          |         |         |         |
| GS1 (.p1.) | 0.902    | 0.051   | 17.617  | 0.000   |
| GS2 (.p2.) | 0.694    | 0.057   | 12.205  | 0.000   |
| GS3 (.p3.) | 0.963    | 0.054   | 17.834  | 0.000   |
| GS4 (.p4.) | 0.446    | 0.039   | 11.377  | 0.000   |
| GS5 (.p5.) | 0.907    | 0.049   | 18.513  | 0.000   |
| GS6 (.p6.) | 1.054    | 0.058   | 18.280  | 0.000   |
| GS7 (.p7.) | 0.838    | 0.049   | 17.197  | 0.000   |
| GS8 (.p8.) | 0.554    | 0.041   | 13.614  | 0.000   |

Covariances:

|         | Estimate | Std.Err | z-value | P(> z ) |
|---------|----------|---------|---------|---------|
| .GS4 ~~ |          |         |         |         |
| .GS8    | 0.210    | 0.033   | 6.406   | 0.000   |

Intercepts:

|             | Estimate | Std.Err | z-value | P(> z ) |
|-------------|----------|---------|---------|---------|
| f1          | 0.000    |         |         |         |
| .GS1 (.20.) | 3.056    | 0.062   | 49.295  | 0.000   |
| .GS2 (.21.) | 3.034    | 0.062   | 49.234  | 0.000   |
| .GS3 (.22.) | 3.005    | 0.066   | 45.551  | 0.000   |
| .GS4 (.23.) | 4.262    | 0.042   | 102.556 | 0.000   |
| .GS5 (.24.) | 3.274    | 0.061   | 53.876  | 0.000   |
| .GS6 (.25.) | 3.395    | 0.071   | 47.679  | 0.000   |
| .GS7 (.26.) | 3.685    | 0.059   | 62.927  | 0.000   |
| .GS8 (.27.) | 4.021    | 0.045   | 89.127  | 0.000   |

Variances:

|      | Estimate | Std.Err | z-value | P(> z ) |
|------|----------|---------|---------|---------|
| f1   | 1.000    |         |         |         |
| .GS1 | 0.426    | 0.044   | 9.779   | 0.000   |
| .GS2 | 1.040    | 0.090   | 11.514  | 0.000   |
| .GS3 | 0.492    | 0.050   | 9.907   | 0.000   |
| .GS4 | 0.506    | 0.044   | 11.556  | 0.000   |
| .GS5 | 0.373    | 0.039   | 9.620   | 0.000   |
| .GS6 | 0.517    | 0.053   | 9.706   | 0.000   |
| .GS7 | 0.457    | 0.045   | 10.189  | 0.000   |

PSYCHOMETRIC EVALUATION OF THE GRIT-S

.GS8            0.443   0.040   11.095   0.000

Group 2 [3]:

Latent Variables:

|     |        | Estimate | Std.Err | z-value | P(> z ) |
|-----|--------|----------|---------|---------|---------|
| f1  | ~      |          |         |         |         |
| GS1 | (.p1.) | 0.902    | 0.051   | 17.617  | 0.000   |
| GS2 | (.p2.) | 0.694    | 0.057   | 12.205  | 0.000   |
| GS3 | (.p3.) | 0.963    | 0.054   | 17.834  | 0.000   |
| GS4 | (.p4.) | 0.446    | 0.039   | 11.377  | 0.000   |
| GS5 | (.p5.) | 0.907    | 0.049   | 18.513  | 0.000   |
| GS6 | (.p6.) | 1.054    | 0.058   | 18.280  | 0.000   |
| GS7 | (.p7.) | 0.838    | 0.049   | 17.197  | 0.000   |
| GS8 | (.p8.) | 0.554    | 0.041   | 13.614  | 0.000   |

Covariances:

|      |    | Estimate | Std.Err | z-value | P(> z ) |
|------|----|----------|---------|---------|---------|
| .GS4 | ~~ |          |         |         |         |
| .GS8 |    | 0.318    | 0.045   | 7.098   | 0.000   |

Intercepts:

|      |        | Estimate | Std.Err | z-value | P(> z ) |
|------|--------|----------|---------|---------|---------|
| f1   |        | 0.113    | 0.096   | 1.181   | 0.238   |
| .GS1 | (.20.) | 3.056    | 0.062   | 49.295  | 0.000   |
| .GS2 | (.21.) | 3.034    | 0.062   | 49.234  | 0.000   |
| .GS3 | (.22.) | 3.005    | 0.066   | 45.551  | 0.000   |
| .GS4 | (.23.) | 4.262    | 0.042   | 102.556 | 0.000   |
| .GS5 | (.24.) | 3.274    | 0.061   | 53.876  | 0.000   |
| .GS6 | (.25.) | 3.395    | 0.071   | 47.679  | 0.000   |
| .GS7 | (.26.) | 3.685    | 0.059   | 62.927  | 0.000   |
| .GS8 | (.27.) | 4.021    | 0.045   | 89.127  | 0.000   |

Variances:

|      |  | Estimate | Std.Err | z-value | P(> z ) |
|------|--|----------|---------|---------|---------|
| f1   |  | 0.936    | 0.135   | 6.924   | 0.000   |
| .GS1 |  | 0.519    | 0.062   | 8.370   | 0.000   |
| .GS2 |  | 0.918    | 0.099   | 9.296   | 0.000   |
| .GS3 |  | 0.510    | 0.063   | 8.036   | 0.000   |
| .GS4 |  | 0.495    | 0.053   | 9.396   | 0.000   |
| .GS5 |  | 0.326    | 0.043   | 7.530   | 0.000   |
| .GS6 |  | 0.561    | 0.070   | 8.019   | 0.000   |
| .GS7 |  | 0.405    | 0.050   | 8.129   | 0.000   |
| .GS8 |  | 0.484    | 0.053   | 9.198   | 0.000   |

# PSYCHOMETRIC EVALUATION OF THE GRIT-S

## IRT item parameters

coef(n2,IRTpars=TRUE)

\$GS1

a b1 b2 b3 b4  
par 2.461 -1.825 -0.561 0.283 1.529

\$GS2

a b1 b2 b3 b4  
par 1.465 -2.049 -0.533 0.232 1.674

\$GS3

a b1 b2 b3 b4  
par 2.559 -1.619 -0.47 0.277 1.402

\$GS4

a b1 b2 b3 b4  
par 1.515 -4.797 -2.762 -1.465 0.039

\$GS5

a b1 b2 b3 b4  
par 3.074 -2.008 -0.829 0.016 1.239

\$GS6

a b1 b2 b3 b4  
par 3.125 -1.554 -0.763 -0.223 0.781

\$GS7

a b1 b2 b3 b4  
par 2.899 -2.382 -1.189 -0.416 0.687

\$GS8

a b1 b2 b3 b4  
par 1.922 -4.069 -2.135 -1.003 0.498

\$GroupPars

MEAN\_1 COV\_11  
par 0 1

##ECV



## PSYCHOMETRIC EVALUATION OF THE GRIT-S

```
n1=c(cor(dat1[,126],dat1[,c(80:85,172:175)]))
n2=c(cor(dat1[,27],dat1[,c(80:85,172:175)]))

## cor(dat1[,87],dat1[,126])
# n1=c(cor(dat1[,126],dat1[,c(80:85,172:175)]))
# n2=c(cor(dat1[,87],dat1[,c(80:85,172:175)]))

#Steiger 1980's formula
dep_cor<-function(cor1,cor2,control,n){
  detR=1-cor1^2-cor2^2-control^2+2*cor1*cor2*control
  rbar=(cor1+cor2)/2
  num=(cor1-cor2)*sqrt((n-1)*(1+control))
  den=sqrt(2*((n-1)/(n-3))*detR+rbar^2*(1-control)^3)
  df=n-3
  t1=num/den
  rep1=matrix(NA,nrow=1,ncol=2)
  colnames(rep1)=c('tvalue','df')
  rep1[1,]<-c(t1,df)
  return(rep1)
}

dep_cor(.4,.5,.1,103)

p1=matrix(NA,nrow=length(n1),ncol=2)
for(i in 1:length(n1)){
  p2=dep_cor(n1[i],n2[i],.728,522)
  p1[i,]=p2
}

      tvalues df
[1,] -0.4422268 519
[2,]  1.1231446 519
[3,]  0.5577912 519
[4,] -0.3024296 519
```
